# Supplementary material for: Retinal microvasculature: population epidemiology and concordance in Australian children aged 11–12 years and their parents
Source: PubMed Central journal article supplement — BMJ Open. 2019 Jul 4;9(Suppl 3):44–52. doi: 10.1136/bmjopen-2018-022399 (PMC6624026; doi:10.1136/bmjopen-2018-022399), 2019-07-04
Supplement: bmjopen-2018-022399.draft_revisions.pdf [file bmjopen-2018-022399.draft_revisions.pdf]

# BMJ Open

BMJ Open is committed to open peer review. As part of this commitment we make the peer review history of every article we publish publicly available.

When an article is published we post the peer reviewers' comments and the authors' responses online. We also post the versions of the paper that were used during peer review. These are the versions that the peer review comments apply to.

The versions of the paper that follow are the versions that were submitted during the peer review process. They are not the versions of record or the final published versions. They should not be cited or distributed as the published version of this manuscript.

BMJ Open is an open access journal and the full, final, typeset and author-corrected version of record of the manuscript is available on our site with no access controls, subscription charges or pay-per-view fees (<http://bmjopen.bmj.com>).

If you have any questions on BMJ Open's open peer review process please email [info.bmjopen@bmj.com](mailto:info.bmjopen@bmj.com)

# BMJ Open

## Retinal microvasculature: Population epidemiology, concordance and reliability in 11-12 year old Australians and their parents

|                               |                                                                                                                                                                                                                                                                                                                                                                                                                                                                                                                                                                                                                                                                                                                                                                                                                                                                                                                           |
|-------------------------------|---------------------------------------------------------------------------------------------------------------------------------------------------------------------------------------------------------------------------------------------------------------------------------------------------------------------------------------------------------------------------------------------------------------------------------------------------------------------------------------------------------------------------------------------------------------------------------------------------------------------------------------------------------------------------------------------------------------------------------------------------------------------------------------------------------------------------------------------------------------------------------------------------------------------------|
| Journal:                      | <i>BMJ Open</i>                                                                                                                                                                                                                                                                                                                                                                                                                                                                                                                                                                                                                                                                                                                                                                                                                                                                                                           |
| Manuscript ID                 | bmjopen-2018-022399                                                                                                                                                                                                                                                                                                                                                                                                                                                                                                                                                                                                                                                                                                                                                                                                                                                                                                       |
| Article Type:                 | Research                                                                                                                                                                                                                                                                                                                                                                                                                                                                                                                                                                                                                                                                                                                                                                                                                                                                                                                  |
| Date Submitted by the Author: | 15-Feb-2018                                                                                                                                                                                                                                                                                                                                                                                                                                                                                                                                                                                                                                                                                                                                                                                                                                                                                                               |
| Complete List of Authors:     | <p>Dascalu, Julian ; Murdoch Children's Research Institute<br/> Liu, Mengjiao; Murdoch Children's Research Institute; The University of Melbourne, Department of Paediatrics<br/> Lycett, kate; Murdoch Children's Research Institute; The University of Melbourne, Department of Paediatrics<br/> Grobler, Anneke; Murdoch Children's Research Institute<br/> He, Mingguang; The University of Melbourne, Centre for Eye Research Australia, Royal Victorian Eye and Ear Hospital<br/> Burgner, David; Murdoch Children's Research Institute; The University of Melbourne, Department of Paediatrics<br/> Wong, , Tien Yin ; The University of Melbourne, Centre for Eye Research Australia, Royal Victorian Eye and Ear Hospital; Singapore National Eye Centre, Singapore Eye Research Institute<br/> Wake, Melissa; Murdoch Children's Research Institute; The University of Melbourne, Department of Paediatrics</p> |
| Keywords:                     | Retinal vessel calibre, Retinal vessels, Reference values, Children, Inheritance patterns, Epidemiologic studies                                                                                                                                                                                                                                                                                                                                                                                                                                                                                                                                                                                                                                                                                                                                                                                                          |
|                               |                                                                                                                                                                                                                                                                                                                                                                                                                                                                                                                                                                                                                                                                                                                                                                                                                                                                                                                           |

SCHOLARONE™  
Manuscripts

1  
2  
3 **Retinal microvasculature: Population epidemiology, concordance and reliability in 11-**  
4 **12 year old Australians and their parents**  
5  
6

7 **Authors:** Julian Dascalu,<sup>1</sup> Mengjiao Liu,<sup>1,2</sup> Kate Lycett,<sup>1,2</sup> Anneke Grobler,<sup>1</sup> Mingguang He,<sup>3</sup>  
8 David Burgner,<sup>1,2,4</sup> Tien Wong,<sup>3,5,6</sup> Melissa Wake.<sup>1,2,7</sup>  
9  
10

11 **Affiliations:** <sup>1</sup>Murdoch Children's Research Institute, Parkville, Victoria, Australia;  
12 <sup>2</sup>Department of Paediatrics, The University of Melbourne, Parkville, Victoria, Australia; <sup>3</sup>  
13 Centre for Eye Research Australia, The University of Melbourne, Royal Victorian Eye and  
14 Ear Hospital, East Melbourne, Australia; <sup>4</sup>Department of Paediatrics, Monash University,  
15 Clayton, Victoria, Australia; <sup>5</sup>Singapore Eye Research Institute, Singapore National Eye  
16 Centre, Singapore; <sup>6</sup>Duke-NUS Medical School, National University of Singapore,  
17 Singapore; <sup>7</sup>Department of Paediatrics & The Liggins Institute, The University of Auckland,  
18 Auckland, New Zealand.  
19  
20  
21  
22  
23  
24  
25

26  
27 **Corresponding author:** Prof. Melissa Wake  
28  
29 Murdoch Children's Research Institute  
30  
31 The Royal Children's Hospital  
32  
33 50 Flemington Road, Parkville 3052, VIC Australia.  
34  
35 Telephone: +61 3 9345 5761  
36  
37 Email: melissa.wake@mcri.edu.au  
38  
39

40 **Keywords:** Retinal vessel calibre, retinal vessels, epidemiology, reference values, parents,  
41 children, inheritance patterns, correlation studies, epidemiologic studies, cross-  
42 sectional studies  
43  
44  
45

46  
47 **Word count:** 3636  
48  
49

50 **Abbreviations:** AVR: arteriolar-venular ratio; BIG6: revised Knudston-Parr formula for  
51 calculating CRAE and CRVE using IVAN software; BMI: body mass index; CC: Pearson's  
52 correlation coefficient; CI: confidence interval; CRAE: central retinal arteriolar equivalent;  
53 CRVE: central retinal venular equivalent; GWAS: Genome wide association studies; HV:  
54  
55  
56  
57  
58  
59

1  
2  
3 home visit assessment; IVAN: Interactive Vessel Analysis software; LSAC: Longitudinal  
4 Study of Australian Children; n: number of participants; RC: estimated regression coefficient;  
5 SCORM: Singapore Cohort Study of the Risk Factors for Myopia; SD: standard deviation.  
6  
7  
8  
9  
10  
11  
12  
13  
14  
15  
16  
17  
18  
19  
20  
21  
22  
23  
24  
25  
26  
27  
28  
29  
30  
31  
32  
33  
34  
35  
36  
37  
38  
39  
40  
41  
42  
43  
44  
45  
46  
47  
48  
49  
50  
51  
52  
53  
54  
55  
56  
57  
58  
59  
60

## ABSTRACT

**Objectives:** To describe distributions and concordance of the retinal microvasculature measurements in a population-based sample of Australian parent-child dyads at child age 11-12 years.

**Design:** Cross-sectional study based on the Child Health CheckPoint, between Waves 6 and 7 of the Longitudinal Study of Australian Children (LSAC).

**Setting:** Assessment centres in seven Australian cities, February 2015-March 2016.

**Participants:** Of all participating CheckPoint families (n=1874), 1288 children (51% girls, mean age 12.0) and 1264 parents (87% mothers, mean age 43.7) were included.

**Outcome measures:** Retinal photographs were taken by non-mydratic fundus camera. Trained graders scored vascular calibre using semi-automated software, yielding estimates of central retinal arteriolar and venular equivalents (CRAE, CRVE) and arteriolar-venular ratio (AVR). Pearson's correlation coefficients and multivariable linear regression models assessed parent-child concordance. Survey weights and methods accounted for LSAC's complex sampling, stratification and clustering within postcodes.

**Results:** Mean (standard deviations) of CRAE and CRVE were slightly larger in children (159.5 (11.8) and 231.1 (16.5) $\mu\text{m}$ , respectively) than parents (151.5 (14.0) and 220.6 (19.0) $\mu\text{m}$ ), yielding similar AVR (children 0.69 (0.05), parents 0.69 (0.06)). Correlation coefficients for parent-child pairs were 0.22 (95% CI 0.16 to 0.27) for CRAE, 0.23 (95% CI 0.17 to 0.28) for CRVE and 0.18 (95% CI 0.13 to 0.24) for AVR. Mother-child and father-child values were similar (0.20 and 0.32 for CRAE, 0.22 and 0.29 for CRVE, respectively). Relationships attenuated slightly on adjustment for parent and child age, sex, blood pressure, diabetes and body mass index. Percentiles and concordance are presented for the whole sample and by sex.

**Conclusions:** Arteriolar and venular calibre were slightly smaller in midlife than late childhood, contrasting with previous reports of increasing arteriolar calibre across this period. This highlights the need for robust population normative values across the lifecourse. Population parent-child concordance values align with moderate polygenic heritability reported in smaller studies.

## STRENGTHS AND LIMITATIONS OF THIS STUDY

- This is the largest Australian population-based study to investigate concordance of microvascular structural measurements
- Our adult sample provides novel data regarding the relatively neglected mid-life phase, with most other adult population samples being elderly
- We used gold-standard methodology and demonstrated high inter- and intra-rater reliability
- Most of the participating parents were mothers, resulting in less precise descriptive and concordance estimates for fathers

## INTRODUCTION

The role of the microvasculature (ie small vessels) is increasingly recognised in the pathogenesis of cardiovascular disease.<sup>1-3</sup> Microvascular abnormalities already present in early life are thought to predispose to both cardiovascular risk factors and outcomes (eg stroke, myocardial infarction).<sup>4-6</sup>

The retina offers a fast, non-invasive platform to study microvascular health *in vivo*, with similar pathological changes associated with abnormalities and diseases in the cerebral, coronary and renal microvasculatures.<sup>7-10</sup> The most commonly assessed retinal microvasculature measure is the vessel calibre (diameter),<sup>10</sup> summarised as the central retinal arteriolar and venular equivalents (CRAE, CRVE) and its ratio, the arteriolar-venular ratio (AVR). There is good evidence that retinal vessel calibre is associated with subsequent cardiovascular disease, with cardiovascular risk factors (such as hypertension, diabetes mellitus and obesity) affecting the retinal arterioles and venules likely via both shared and unique underlying pathophysiology.<sup>6, 11, 12</sup> Thus, the retinal vasculature has been suggested to be a robust biomarker of cardio-metabolic diseases and allows studying the natural course of small vessel changes over life and its relationship to cardiovascular outcomes in later years.<sup>10,</sup>

However, an important gap in the literature is that the natural course and determinants of the retinal vascular calibre is not fully documented. There is some evidence for distinct but differing curvilinear relationships of arteriolar and venular calibres with age.<sup>10, 11</sup> Thus, from disparate cross-sectional studies, Ikram's 2012 narrative review reported that both arteriolar and venular calibre increased from birth (85.5 and 130.0  $\mu\text{m}$  respectively) to age 6 years (165.6 and 232.0  $\mu\text{m}$ ). Arteriolar calibre increased further by midlife (202.3  $\mu\text{m}$ ) while venular calibre remained static, with calibres of both arterioles and venules reduced from midlife to old age.<sup>10</sup> However, limitations to this literature include differing protocols for imaging and scoring and a marked under-representation of population studies, with few data from young and mid-adulthood. These limitations preclude robust conclusions regarding reference ranges and predictive cutpoints across the lifespan.

While heritability of retinal vascular calibres appears substantial from small community-based samples using a variety of protocols,<sup>11</sup> large studies of parent-child pairs drawn from the general population are lacking. Parent-child correlations for CRAE and CRVE respectively were 0.24 and 0.27 in 341 American adult pairs (aged 43-86 years) in the

1  
2  
3 Beaver Dam Eye Study;<sup>13</sup> 0.13 and 0.20 for 174 adult pairs from the Flemish Study on  
4 Environment, Genes and Health Outcomes (aged 20+ years)<sup>14</sup> and 0.12 and 0.31 in 304 pairs  
5 from the Strabismus, Amblyopia and Refractive Error in Singaporean Children study (mean  
6 ages 40 years for parents, 9 years for children).<sup>15</sup> In all three studies spousal concordance was  
7 negligible for both metrics. In contrast, monozygotic twins have shown much higher  
8 concordance (CRAE 0.60 to 0.80, CRVE 0.63 to 0.88) than dizygotic pairs (CRAE 0.12 to  
9 0.50 and CRVE 0.13 to 0.35),<sup>16-19 20</sup> with higher heritability estimates in twin (CRAE 0.56 to  
10 0.70, CRVE 0.64 to 0.83) than parent-child pairs (CRAE 0.25 to 0.54, CRVE 0.28 to 0.72).<sup>13-</sup>  
11  
12  
13  
14  
15  
16  
17  
18  
19  
20  
21  
22  
23  
24  
25  
26  
27  
28  
29  
30  
31  
32  
33  
34  
35  
36  
37  
38  
39  
40  
41  
42  
43  
44  
45  
46  
47  
48  
49  
50  
51  
52  
53  
54  
55  
56  
57  
58  
59  
60

<sup>19</sup> Genome-wide studies have identified several promising loci associated with retinal vessel calibre.<sup>19, 21</sup> However, it remains unclear whether these values remain constant across the lifecourse or what opportunities these offer for preventive health.

Thus, understanding the population epidemiology of retinal calibre in larger studies of healthy mid-life adults and children would inform age- and sex-specific reference values and facilitate secular trend analyses, international comparisons and, potentially, early risk stratification. The Child Health Check Point, a cross-sectional biophysical assessment nested within the Longitudinal Study of Australian Children (LSAC), provided an opportunity to address this issue/question in a national population-based sample of Australian parent-child dyads at child age 11-12 years. We aimed to (1) assess the distribution of retinal vessel calibre in both age groups, and (2) investigate parent-child concordance of these measures. Additionally, we provide intra- and inter-grader reliability estimates to quantify reliability and measurement error.

## METHODS

**Study Design and Participants:** Details of the initial LSAC study design and recruitment are outlined elsewhere.<sup>22, 23</sup> Briefly, LSAC recruited a nationally representative birth cohort (B cohort) of 5107 infants using a 2-stage clustered design, and followed them up in biennial 'waves' of data collection up to 2015.<sup>23</sup> The initial recruitment rate in 2004 was 57.2%, of whom 73.7% (n=3764) were retained to LSAC wave 6 in 2014. At the wave 6 visit, all contactable and consenting families (n=3513) were invited to consent to their contact details being shared with the Child Health CheckPoint team. In 2015, families that consented to contact were sent an information pack via post and received an information and recruitment phone call. The CheckPoint's detailed cross-sectional biophysical assessment, nested between



1  
2  
3 LSAC waves 6 and 7 at child age 11-12 years, took place between February 2015 and March  
4 2016. 1874 families participated. A more detailed description of the CheckPoint study design  
5 is available elsewhere.<sup>24, 25</sup>  
6  
7

8 **Ethics and Consent:** The CheckPoint data collection protocol was approved by The Royal  
9 Children's Hospital Melbourne Human Research Ethics Committee (33225D) and The  
10 Australian Institute of Family Studies Ethics Committee (14-26). The attending  
11 parents/caregivers provided written informed consent for themselves and their children to  
12 participate in the study.  
13  
14  
15

16 **Procedure:** *Retinal imaging:* Retinal photographs were performed during each participant's  
17 3.5-hour visit to the CheckPoint assessment centres in 7 large cities (mainly state capitals)  
18 around Australia. During this 3.4 hour visit, each child and parent rotated sequentially and  
19 separately through a number of 15-minute assessment stations.<sup>24</sup> At the "See Here" station,  
20 participants sat in front of a fundus camera (EOS 60D SLR) while the procedure was  
21 explained; the room was then darkened while the participant rested chin and forehead on the  
22 head rest of the fundus camera for several minutes. Two digital photographs (one each  
23 centering on the optic disc and macula) were taken for each eye using standard protocols  
24 from the Centre for Eye Research Australia. Because CheckPoint was unable to transport its  
25 single retinal camera to smaller regional centres or home visits, 518 CheckPoint families did  
26 not contribute retinal vessel calibre data (figure 1).  
27  
28  
29  
30  
31  
32  
33  
34

35 **Measures:** *Image scoring:* Right eye images were selected as first choice for scoring.  
36 Reasonable correlations ( $r > 0.71$ ) of retinal vascular diameters between right and left eyes  
37 have previously been reported,<sup>26, 27</sup> and this allowed harmonisation with other vascular  
38 measures obtained in CheckPoint, such as pulse wave velocity and blood pressure, that also  
39 assessed the right-sided circulation. Left eye images were used where right eye images were  
40 deemed ungradable. Issues preventing grading of images included poor focus (potentially  
41 blurring vessel edges), dark images (increasing the difficulty for graders to visually validate  
42 the vessel trace), and confounding pathology (which can obscure the vessels). Images were  
43 evaluated at the Zhongshan Ophthalmic Centre in Guangdong, China (77%) and the Centre  
44 for Eye Research Australia in Melbourne, Australia (23%), separately. In total, 2624 images  
45 were graded from 1307 child images and 1317 parent images (87% and 92% from the right  
46 eye for children and parents, respectively). 19 child and 53 parent images did not meet the  
47 quality criteria for use in analyses.  
48  
49  
50  
51  
52  
53  
54  
55  
56  
57  
58  
59  
60

1  
2  
3 Each image was graded by one of four experienced graders (two from China and two from  
4 Australia) masked to participant characteristics measured the diameters of retinal vessels  
5 using the software program Integrative Vessel Analysis (IVAN, University of Wisconsin,  
6 Madison, USA). Retinal vessels were identified as arterioles or venules from a specific area  
7 (one-half to one disc diameter from the margin of the optic disc). Each grader then selected a  
8 segment of each vessel within this area for measurement. Diameters of all the selected  
9 segments were measured automatically by the IVAN software. For each participant, summary  
10 estimates of the average retinal vascular calibre were calculated according to the Big-Six  
11 (revised Knudston-Parr) formula,<sup>26</sup> which combines measurements of the six largest  
12 arterioles or venules, represented as the CRAE and CRVE. The AVR was calculated as  
13 CRVE divided by the CRAE.

14  
15 **Other sample characteristics:** Measures of potential confounding variables were included as  
16 detailed elsewhere.<sup>24</sup> Briefly, age was calculated to nearest week using date of birth, either  
17 imported from Medicare Australia's database at the time of LSAC enrolment (child) or self-  
18 reported (parent), and date of assessment. Sex was self-reported.

19  
20 Anthropometry was obtained as previously described.<sup>24</sup> Body mass index (BMI) was  
21 calculated as kg/m<sup>2</sup>. Standing height was obtained using a portable rigid stadiometer (Invicta  
22 IP0955, Leicester, UK), measured twice without shoes or socks; a third measurement was  
23 taken if the first two measures differed by  $\geq 0.5$ cm, and the average of the 2 or 3 values was  
24 then calculated. Weight was measured with light clothing and without shoes or socks using 4-  
25 limb segmental (InBody230, Biospace, Seoul, South Korea) body composition scales. For  
26 children, an age- and sex-adjusted BMI z-score was calculated using the US Centers for  
27 Disease Control and Prevention growth reference charts.<sup>28</sup>

28  
29 Blood pressure was measured using the SphygmoCor XCEL (AtCor Medical Pty Ltd., West  
30 Ryde, NSW, Australia). Following seven minutes in supine position at rest, systolic and  
31 diastolic blood pressures were measured at the brachial artery up to three times, with mean  
32 values reported. Mean arterial blood pressure was calculated from the systolic and diastolic  
33 measures.

34  
35 In Australia, Socio-Economic Indexes for Areas provide standardised scores for  
36 socioeconomic position by geographic area (postcode of family domicile) compiled from  
37 2011 Australian Census data. We used the Socio-Economic Indexes for Areas Index of  
38 Relative Socioeconomic Disadvantage (Disadvantage Index) which numerically summarises  
39  
40  
41  
42  
43  
44  
45  
46  
47  
48  
49  
50  
51  
52  
53  
54  
55  
56  
57  
58  
59  
60

1  
2  
3 the social and economic conditions of Australian neighbourhoods (national mean of 1000 and  
4 standard deviation (SD) of 100, where higher values represent less disadvantage).<sup>29</sup> Parents  
5 reported child and parent past medical histories via iPad-administered questionnaires at the  
6 Assessment Centre.  
7  
8

9  
10 **Statistical analyses:** All analyses were performed using Stata (14.2). Continuous descriptive  
11 variables were summarised using weighted means and standard deviations (SD); categorical  
12 variables were summarised by number and weighted percentage for children and adults  
13 separately and by gender. Survey weights were calculated taking into account the selection  
14 probability of each child, and were adjusted for non-response, loss to follow-up and  
15 benchmarked to population numbers in major (post stratification) categories of the population  
16 of children born in 2004. Standard errors were calculated taking into account the complex  
17 design and survey weights.<sup>30</sup> More details on the calculation of survey weights is provided  
18 elsewhere.<sup>24, 31</sup>  
19  
20  
21  
22  
23

24  
25 Concordance between parents and children was assessed by 1) Pearson's correlation  
26 coefficients with 95% confidence intervals (CI); 2) linear regression with child variable as  
27 dependent variable and parent variable as independent variable adjusted for parent and child  
28 age, BMI, mean arterial blood pressure, family disadvantage index score and sex where  
29 appropriate; and 3) partial correlation coefficients adjusted for the same covariates. The  
30 Pearson's correlation and linear regression analyses were repeated using weighted multi-level  
31 survey analyses; as these yielded similar results, unweighted results are displayed.  
32  
33  
34  
35

36  
37 **Reliability of retinal vessel calibre measurements:** Inter-grader reliability was assessed by  
38 three of the four graders reanalysing a subset of 50 randomly chosen images. To assess intra-  
39 grader reliability, the same three graders each re-graded 25 of the 50 randomly chosen  
40 images. Hence, an assessment was made as to reproducibility of grading made by different  
41 graders and repeatability of gradings made by the same grader. Two-way mixed-effects  
42 intraclass correlation coefficients were used for the reliability analysis.  
43  
44  
45  
46  
47  
48  
49  
50  
51  
52  
53  
54  
55  
56  
57  
58  
59  
60

## RESULTS

**Sample characteristics:** A total of 2552 participants (1288 children and 1264 adults) were available for the descriptive Aim 1 analyses (figure 1). This represents 95% of the 1356 pairs who attended CheckPoint assessment centres with retinal photography. As well as the 518 participants already excluded because they attended smaller centres without a retinal camera or had a home visit, a further 160 participants were excluded because they refused at the time, an image could not be taken (eg the camera required repair) or the quality was too poor (figure 1). To address aim 2, 1159 parent-child pairs were assessed; 10 non-biologic adult-child pairs, 29 diabetic parents and 3 diabetic children were excluded from the concordance assessments (figure 1).

Table 1 shows sample characteristics of children and parents stratified by sex. In children, sex was evenly represented (51% girls), while mean age- and sex-specific BMI z-scores were higher than Center for Disease Control historical norms (0.37). The parent sample largely comprised mothers (86.6%), with participants on average being slightly more advantaged (Disadvantage Index mean score 1009, SD 69) than the national Australian population (mean 1000, SD 100).<sup>29</sup>

**Descriptive epidemiology of retinal vessel calibre:** Summary statistics for parent and child retinal values are displayed in table 1, and broken down for reference into 5<sup>th</sup> to 95<sup>th</sup> percentiles in table 2. The corresponding distribution graphs (figure 2) demonstrate approximately normal distribution in all measures for both children and adults. It also highlights that children had larger values for both mean CRAE and CRVE (159.48 $\mu$ m and 231.09 $\mu$ m respectively) than parents (151.41 $\mu$ m and 220.61 $\mu$ m respectively) but narrower distributions (SD 11.8 $\mu$ m vs 14.0 $\mu$ m for CRAE and 16.5 $\mu$ m vs 19.0 for CRVE, respectively, table 1). Boys' CRAE and CRVE mean values were marginally smaller than girls' values (CRAE 156.8 $\mu$ m vs 162.1 $\mu$ m, CRVE 227.8 $\mu$ m vs 234.3 $\mu$ m), and fathers similarly showed smaller mean values than mothers (CRAE 148.4 $\mu$ m vs 152.0 $\mu$ m, CRVE 217.9 $\mu$ m vs 221.0 $\mu$ m). Mean AVR was strikingly similar in parents and children, and between all four groups.

**Table 1. Sample characteristics and retinal vessel calibre measures, stratified by sex, of children and parents**

| Sample characteristics                               | Mean (SD) <sup>*</sup> |                |                 |
|------------------------------------------------------|------------------------|----------------|-----------------|
|                                                      | All                    | Male           | Female          |
| <b>Children<sup>†</sup></b>                          | <b>(n=1288)</b>        | <b>(n=633)</b> | <b>(n=655)</b>  |
| Age, years                                           | 11.96 (0.4)            | 11.96 (0.4)    | 11.96 (0.4)     |
| BMI, kg/m <sup>2</sup>                               | 19.4 (3.6)             | 19.2 (3.6)     | 19.6 (3.6)      |
| BMI z-score                                          | 0.37 (1.0)             | 0.37 (1.0)     | 0.38 (1.0)      |
| Systolic blood pressure, mmHg                        | 108.7 (8.2)            | 108.3 (8.4)    | 109.1 (7.9)     |
| Diastolic blood pressure, mmHg                       | 63.3 (5.7)             | 63.0 (6.1)     | 63.6 (5.2)      |
| Neighbourhood disadvantage index                     | 1011.2 (61.0)          | 1009.6 (63.2)  | 1012.8 (58.8)   |
| Diabetes (%)                                         | 0.4                    | 0.2            | 0.6             |
| Eye condition or glasses/contact lenses (%)          | 20.9                   | 17.9           | 23.8            |
| <i>Retinal vessel measures</i>                       |                        |                |                 |
| Central retinal arteriolar equivalent, $\mu\text{m}$ | 159.5 (11.8)           | 156.8 (11.8)   | 162.1 (11.2)    |
| Central retinal venular equivalent, $\mu\text{m}$    | 231.1 (16.5)           | 227.8 (15.6)   | 234.3 (16.8)    |
| Arteriolar-venular ratio                             | 0.69 (0.05)            | 0.69 (0.05)    | 0.69 (0.05)     |
| <b>Parents<sup>‡</sup></b>                           | <b>(n=1264)</b>        | <b>(n=169)</b> | <b>(n=1095)</b> |
| Age, years                                           | 43.7 (5.6)             | 46.2 (6.5)     | 43.4 (5.3)      |
| BMI, kg/m <sup>2</sup>                               | 28.4 (6.5)             | 28.7 (4.2)     | 28.3 (6.7)      |
| Systolic blood pressure, mmHg                        | 120.5 (12.9)           | 238.4 (11.6)   | 119.3 (12.7)    |
| Diastolic blood pressure, mmHg                       | 73.8 (8.8)             | 78.3 (8.4)     | 73.1 (8.6)      |
| Diabetes (%)                                         | 2.9                    | 5.3            | 2.6             |
| Eye condition or glasses/contact lenses (%)          | 53.2                   | 47.0           | 54.12           |
| <i>Retinal vessel measures</i>                       |                        |                |                 |
| Central retinal arteriolar equivalent, $\mu\text{m}$ | 151.5 (14)             | 148.4 (14.3)   | 152.0 (13.8)    |
| Central retinal venular equivalent, $\mu\text{m}$    | 220.6 (19)             | 217.9 (21.3)   | 221.0 (18.6)    |
| Arteriolar-venular ratio                             | 0.69 (0.06)            | 0.68 (0.06)    | 0.69 (0.06)     |

<sup>\*</sup>Mean (SD), unless otherwise specified; <sup>†</sup>n for each child variable ranges from 1213-1288; <sup>‡</sup>n for each parent variable ranges from 1169-1264. SD, standard deviation; BMI, Body Mass Index

Table 2. Retinal vessel calibre percentiles

| Retinal calibre                                                        | Child |       |       |       |       |       |       | Parent |       |       |       |       |       |        |
|------------------------------------------------------------------------|-------|-------|-------|-------|-------|-------|-------|--------|-------|-------|-------|-------|-------|--------|
|                                                                        | P5    | P10   | P25   | P50   | P75   | P90   | P95   | P5     | P10   | P25   | P50   | P75   | P90   | P95    |
| <b>Central retinal arteriolar equivalent, <math>\mu\text{m}</math></b> |       |       |       |       |       |       |       |        |       |       |       |       |       |        |
| Male                                                                   | 137.1 | 141.5 | 148.0 | 158.0 | 165.1 | 170.7 | 174.2 | 123.6  | 128.7 | 139.9 | 148.3 | 158.2 | 167.2 | 171.6  |
| Female                                                                 | 143.8 | 147.3 | 153.8 | 162.5 | 169.9 | 175.3 | 179.3 | 128.8  | 134.8 | 143.3 | 152.1 | 162.3 | 169.1 | 174.0  |
| All                                                                    | 139.8 | 144.0 | 151.3 | 160.2 | 167.6 | 173.1 | 178.5 | 128.1  | 134.1 | 143.0 | 151.4 | 161.7 | 169.0 | 173.7  |
| <b>Central retinal venular equivalent, <math>\mu\text{m}</math></b>    |       |       |       |       |       |       |       |        |       |       |       |       |       |        |
| Male                                                                   | 203.3 | 208.9 | 217.7 | 226.7 | 237.4 | 247.4 | 252.7 | 186.8  | 190.9 | 202.1 | 215.4 | 231.5 | 247.6 | 261.54 |
| Female                                                                 | 208.8 | 213.3 | 222.6 | 234.0 | 245.4 | 256.8 | 262.8 | 192.3  | 197.5 | 208.4 | 220.8 | 233.8 | 244.8 | 253.0  |
| All                                                                    | 206.1 | 210.8 | 220.4 | 230.4 | 241.4 | 252.1 | 259.3 | 190.9  | 196.8 | 207.2 | 220.2 | 233.7 | 245.7 | 253.0  |
| <b>Arteriolar-venular ratio</b>                                        |       |       |       |       |       |       |       |        |       |       |       |       |       |        |
| Male                                                                   | 0.61  | 0.63  | 0.66  | 0.69  | 0.72  | 0.76  | 0.78  | 0.6    | 0.61  | 0.64  | 0.67  | 0.73  | 0.78  | 0.79   |
| Female                                                                 | 0.61  | 0.62  | 0.66  | 0.69  | 0.73  | 0.76  | 0.78  | 0.59   | 0.61  | 0.65  | 0.69  | 0.73  | 0.77  | 0.78   |
| All                                                                    | 0.61  | 0.63  | 0.66  | 0.69  | 0.72  | 0.76  | 0.78  | 0.59   | 0.61  | 0.65  | 0.69  | 0.73  | 0.77  | 0.78   |

P: percentile.

1  
2  
3 **Parent-child concordance:** Correlations for the 1186 parent-child pairs are displayed in table  
4 3. Pearson's correlations for parent-child dyads were 0.22 for CRAE and 0.23 for CRVE  
5 (0.23), and (as expected for a derived ratio value) slightly smaller for AVR (0.18). Mother-  
6 child and father-child correlations are presented for reference but not compared statistically,  
7 noting slightly higher values for father-child dyads but wider CIs in keeping with the much  
8 smaller numbers. In linear regression adjusting for all covariates, estimates attenuated only  
9 marginally and all associations remained strong (estimated regression coefficients for parent-  
10 child dyads: CRAE 0.19, CRVE 0.21, AVR 0.16) with the exception of father-child AVR.  
11 Similarly, partial correlations adjusted for covariates attenuated slightly (correlation  
12 coefficient decreased by 0.01 to 0.06, data not shown).  
13  
14  
15  
16  
17  
18  
19  
20  
21  
22  
23  
24  
25  
26  
27  
28  
29  
30  
31  
32  
33  
34  
35  
36  
37  
38  
39  
40  
41  
42  
43  
44  
45  
46  
47  
48  
49  
50  
51  
52  
53  
54  
55  
56  
57  
58  
59  
60

**Table 3. Parent-child concordance**

|                                                   | Parent-child |           |                | Mother-child |           |                | Father-child |           |                |
|---------------------------------------------------|--------------|-----------|----------------|--------------|-----------|----------------|--------------|-----------|----------------|
|                                                   | N            | CC        | 95% CI         | N            | CC        | 95% CI         | N            | CC        | 95% CI         |
| <b>Pearson's Correlation</b>                      |              |           |                |              |           |                |              |           |                |
| Central retinal arteriolar calibre,               | 1186         | 0.22      | 0.16 to 0.27   | 1029         | 0.20      | 0.14 to 0.26   | 157          | 0.32      | 0.17 to 0.45   |
| Central retinal venular calibre                   | 1186         | 0.23      | 0.17 to 0.28   | 1029         | 0.22      | 0.16 to 0.28   | 157          | 0.29      | 0.14 to 0.42   |
| Arteriolar-venular ratio                          | 1186         | 0.18      | 0.13 to 0.24   | 1029         | 0.18      | 0.12 to 0.24   | 157          | 0.20      | 0.04 to 0.35   |
| <b>Adjusted Linear Regression</b>                 | <b>N</b>     | <b>RC</b> | <b>P value</b> | <b>N</b>     | <b>RC</b> | <b>P value</b> | <b>N</b>     | <b>RC</b> | <b>P value</b> |
| Central retinal arteriolar calibre, $\mu\text{m}$ | 998          | 0.18      | <0.001         | 867          | 0.18      | <0.001         | 131          | 0.21      | 0.004          |
| Central retinal venular calibre, $\mu\text{m}$    | 998          | 0.20      | <0.001         | 867          | 0.20      | <0.001         | 131          | 0.22      | 0.003          |
| Arteriolar-venular ratio                          | 998          | 0.16      | <0.001         | 867          | 0.16      | <0.001         | 131          | 0.15      | 0.06           |

Non-biological caregivers (n=10), diabetic children (n=3) and diabetic adults (n=29) were excluded from these analyses (n=10). Covariates in adjusted linear regression models include parent and child age, BMI and Disadvantage Index, mean arterial blood pressure and parent and child sex in models including both sexes. CC: estimated Pearson's correlation coefficient; CI: confidence interval; N: number of biological child-parent pairs with this measure; RC: estimated regression coefficient.



1  
2  
3 **Reliability analysis:** Within-grader intraclass correlations were very high for all three graders for  
4 CRAE (0.90 to 0.99, 95% CI 0.76 to 0.99) and CRVE (0.92 to 0.98, 95% CI 0.82 to 0.99). This  
5 equated to a greater within-grader range for the derived AVR variable (0.69 to 0.97, 95% CI 0.28  
6 to 0.99). Between-grader interclass correlations were also high at 0.79 (95% CI 0.47 to 0.91),  
7 0.92 (95% CI 0.77 to 0.96) and 0.75 (95% CI 0.58 to 0.86) for CRAE, CRVE and AVR  
8 respectively.  
9  
10  
11  
12  
13  
14

15 **Post-hoc analysis:** As noted above, both CRAE and CRVE were slightly smaller in the mid-life  
16 parents than the 11-12 year olds, whereas from Ikram's 2012 narrative review we had expected  
17 that CRAE would have increased substantially by midlife while CRVE would remain static (prior  
18 to both reducing into old age).<sup>10</sup> Therefore, in post-hoc analyses we plotted mean values for  
19 CRAE and CRVE by mean age (figure 3) for 15 community-based studies published since 2004  
20 with participants aged from 6 years to old age.<sup>18, 32-44</sup> We included all adult studies (summarised in  
21 supplementary table 1) in Sun et al's systematic review<sup>11</sup> that had a community or population-  
22 based sample of >1000 individuals;<sup>37-44</sup> the Norwegian Tromso Eye Study was identified through  
23 cited reference searches.<sup>33</sup> Sun's review also identified the child population in the Singapore  
24 Cohort Study of the Risk Factors for Myopia (SCORM),<sup>32</sup> and we searched the SCORM study's  
25 bibliography and other published reviews for additional children's cohorts.<sup>18, 34-36</sup> We  
26 superimposed the results from CheckPoint, separately for adults and children. As visual  
27 inspection did not suggest a curvilinear relationship, we then fitted two exploratory linear  
28 regression models, with mean age for each study (CheckPoint children and parents considered  
29 separately) as the independent variable and with calibre size (arteriolar and venular) as the two  
30 dependent variables. It can be seen that venular calibre appears to narrow slightly though not  
31 significantly different from 0, at a rate of approximately -1.2  $\mu\text{m}$  per decade from childhood  
32 through adulthood ( $\beta$  coefficient -0.12, 95% CI -0.37 to 0.14,  $R^2 = 0.03$ ) while there was no  
33 obvious trend for arteriolar calibre ( $\beta$  coefficient -0.02, 95% CI -0.21 to 0.17,  $R^2 = 0.002$ ). Two  
34 striking features of the figure are the dearth of published values between childhood and late life,  
35 and the marked spread of mean values in the elderly.  
36  
37  
38  
39  
40  
41  
42  
43  
44  
45  
46  
47  
48  
49  
50  
51

## 52 DISCUSSION

53 **Principal findings:** We provide the first national population-based percentile values for the  
54 pattern and distributions of retinal vessel calibre in Australian 11-12 year old children and mid-life  
55  
56  
57  
58  
59  
60

1  
2  
3 adults, demonstrating an age-related decrease in both mean CRAE and CRVE between mid-  
4 childhood and mid-life. Parent-child correlations were similar for all retinal vessel calibre metrics  
5 (CRAE 0.20, CRVE 0.22, AVR 0.17) to studies whose offspring probands were already adults,  
6 suggesting that the strong element of heritability in microvascular anatomical structure is largely  
7 phenotypically overt within the first decade of life.  
8  
9

10  
11 **Strengths and weaknesses:** Strengths include the national recruitment basis for this large study,  
12 providing a reference point for microvascular measurement for future Australian studies but also  
13 filling a significant international gap in population-based studies of these age groups. Results were  
14 largely consistent with previous studies and should generalise to the wider Australian child  
15 population.  
16  
17

18  
19  
20 Limitations include our under-representation of the most disadvantaged sector (reflecting social  
21 biases in both recruitment and retention, issues common to large longitudinal studies) and the  
22 small number of fathers in the parent sample. We adjusted only for a limited range of potential  
23 confounders. Parent-child concordance values might have changed slightly had we further adjusted  
24 for smoking status, sedentary lifestyle and diet, all previously associated with altered retinal vessel  
25 calibre.<sup>45</sup> However, their impact on concordance would likely be small because these factors are  
26 all strongly socially patterned. By 2019 this cohort will also be able to consider genome-wide  
27 association data, potentially shedding further light on the roles of genetic and shared  
28 environmental factors. We did not assess other elements of the microvasculature such as  
29 branching angles, tortuosity or fractal dimension. We were not able to control for refractive errors  
30 in this study. Retinal vascular calibre measurements may be influenced by refractive errors and  
31 refraction is different between children and adults.<sup>46, 47</sup> However, we would expect these effects  
32 to be small, particularly as other sources of systematic bias were minimised (measured on the  
33 same day with the same equipment by the same person who was blind to dyadic membership).  
34  
35  
36  
37  
38  
39  
40  
41  
42  
43  
44

45 **Meaning and implications for clinicians and policy makers:** Findings for all outcomes are  
46 consistent with the previous literature. However, direct comparisons of CRAE and CRVE across  
47 the lifecourse and between ethnicities remain difficult due to differences in equipment, software  
48 and analysis formulae for CRAE and CRVE. Such factors could well account for the differences  
49 between our own and three international studies at mean age 11.1-12.7 years: smaller mean CRAE  
50 and CRVE in Chinese twins (CRAE 150.1- $\mu\text{m}$ , CRVE 218.4 $\mu\text{m}$ ) and Singapore Chinese children  
51 (CRAE 149.3 $\mu\text{m}$ , CRVE 224.6 $\mu\text{m}$ ), but much larger values in a smaller study of German children  
52  
53  
54  
55  
56  
57  
58  
59  
60

1  
2  
3 (CRAE 208 $\mu$ m, CRVE 236.2 $\mu$ m).<sup>18, 32, 48</sup> These discrepancies highlight the need for a uniform  
4 approach to measurement of retinal parameters in future epidemiological investigations. Our post-  
5 hoc analysis of published literature highlights both the dearth of population studies between  
6 childhood and old age and a likely fall in venular calibre from childhood through midlife. An  
7 individual participant meta-analysis would be the next step to more precisely determine how  
8 retinal calibre varies by age.  
9  
10  
11

12  
13 The moderate parent-child correlations of this Australian population are very similar to those in  
14 previous studies with much older adult offspring, suggesting that in terms of microvasculature  
15 children do not become more phenotypically similar to their parents between childhood and  
16 midlife. Although this is the first study to report intergenerational concordance by parent sex, our  
17 marginally stronger father-child than mother-child correlations must be taken with caution due to  
18 the small sample of fathers. Like all other parent-child and twin studies except the Beaver Dam  
19 Eye Study, our CRVE correlations were marginally larger than those for CRAE.<sup>13-19</sup> Previously,  
20 Li et al. have postulated that the retinal arteriolar phenotype may be more sensitive to  
21 environmental influences than the venular phenotype, despite having a significant, moderate  
22 degree of inheritance.<sup>15</sup> This is further supported by GWAS studies, where only CRVE showed  
23 significant associations with the identified gene loci.<sup>19, 21</sup>  
24  
25  
26  
27  
28  
29  
30

31 **Unanswered questions and future research:** We provide normative values for retinal vessel  
32 calibre for Australian 11-12 year olds and mid-life adults using standardised protocols. Mapped  
33 onto other publications (figure 3), our findings make explicit a need for reliable age-specific  
34 normative reference values across the lifecourse. This would need to be extended to large long-  
35 running cohort studies with access to clinical outcomes if retinal calibre is to realise the potential  
36 as a population screening and risk stratification tool for cardiovascular disease, with or without  
37 consideration of other retinal vascular features, polygenic risk scores and macrovascular risk.  
38  
39  
40  
41  
42  
43  
44  
45  
46  
47  
48  
49  
50  
51  
52  
53  
54  
55  
56  
57  
58  
59  
60

1  
2  
3  
4  
5 **ACKNOWLEDGEMENTS:** This paper uses unit record data from Growing Up in Australia, the  
6 Longitudinal Study of Australian Children. The study is conducted in partnership between the  
7 Department of Social Services (DSS), the Australian Institute of Family Studies (AIFS) and the  
8 Australian Bureau of Statistics (ABS). The findings and views reported in this paper are those of  
9 the author and should not be attributed to DSS, AIFS or the ABS. REDCap (Research Electronic  
10 Data Capture) electronic data capture tools.<sup>49</sup> More information about this software can be found  
11 at: [www.project-redcap.org](http://www.project-redcap.org). We thank the LSAC and CheckPoint study participants, staff and  
12 students for their contributions.  
13  
14  
15  
16  
17

18 **COMPETING INTERESTS:** All authors have completed the ICMJE uniform disclosure form  
19 at [www.icmje.org/coi\\_disclosure.pdf](http://www.icmje.org/coi_disclosure.pdf) and declare financial support as described in the funding  
20 section. MW received support from Sandoz to present at a symposium outside the submitted work.  
21  
22  
23

24 **FUNDING:** This work was supported by the National Health and Medical Research Council  
25 (NHMRC) of Australia (Project Grants 1041352, 1109355), The Royal Children's Hospital  
26 Foundation (2014-241), the Murdoch Children's Research Institute, The University of Melbourne,  
27 the National Heart Foundation of Australia (100660) and Financial Markets Foundation for  
28 Children (2014-055, 2016-310). The following authors were supported by the NHMRC: Senior  
29 Research Fellowships to MW (1046518) and DPB (1064629); Early Career Fellowship to KLy  
30 (1091124). The following authors were supported by the National Heart Foundation of Australia:  
31 Honorary Future Leader Fellowship to DPB (100369); Postdoctoral Fellowship to KLy (101239).  
32 MW was supported by Cure Kids New Zealand and ML by a Melbourne International Research  
33 Scholarship. The MCRI administered the research grants for the study and provided infrastructural  
34 support (IT and biospecimen management) to its staff and the study, but played no role in the  
35 conduct or analysis of the trial. DSS played a role in study design; however, no other funding  
36 bodies had a role in the study design and conduct; data collection, management, analysis, and  
37 interpretation; preparation, review, or approval of the manuscript; and decision to submit the  
38 manuscript for publication. Research at the MCRI is supported by the Victorian Government's  
39 Operational Infrastructure Support Program.  
40  
41  
42  
43  
44  
45  
46  
47  
48  
49

50 **CONTRIBUTIONS:** MW, TW, DB and KL contributed to the study design. JD, ML and MH  
51 contributed to the acquisition of data. AG, KL, ML and JD conducted the data analysis. JD drafted  
52 the manuscript with critical input from all authors. MW and KL supervised JD. MW is the  
53  
54  
55  
56  
57  
58  
59

1  
2  
3 principal investigator of the Child Health CheckPoint and conceived the paper. All authors read  
4 and approved the final manuscript.  
5

6 **DATA SHARING STATEMENT:** Dataset and technical documents available from Growing Up  
7 in Australia: The Longitudinal Study of Australian Children via low-cost license for bone fide  
8 researchers. More information is available at [www.growingupinaustralia.gov.au](http://www.growingupinaustralia.gov.au)  
9  
10  
11  
12

### 13 14 **FIGURE CAPTIONS AND FOOTNOTES:**

#### 15 16 **Figure 1. Participant flow through *Child Health Check-Point*.**

17  
18 n: number of families; c: number of children; p: number of attending adults; MAC: Main  
19 assessment centre; mAC: Mini assessment centre; HV: Home visit assessment; LSAC:  
20 Longitudinal Study of Australian Children.  
21  
22

23 \*Unable to collect image due to equipment failure or time constraints.  
24

25 ~Data excluded for images that did not meet quality criteria for 'Big 6' analysis.  
26

27 ^Data from 10 non-biological child-parent pairs excluded from concordance analyses  
28

#### 29 30 **Figure 2. Density plots for retinal vessel calibre measures.**

31  
32 AVR: arteriolar-venular ratio; CRAE: central retinal arteriolar equivalent; CRVE: central retinal  
33 venular equivalent; BIG6: revised knudston-parr formula for calculating CRAE and CRVE using  
34 IVAN software.<sup>26</sup>  
35  
36

#### 37 38 **Figure 3. Epidemiology of retinal vascular calibre by age.**

39  
40 Mean retinal arteriolar and venular calibre by age from CheckPoint and published community-  
41 based studies with n>1000. Each symbol represents the mean value for a single study. Each study  
42 is summarised in supplementary table 1, and the paper from which that study's data are drawn is  
43 provided in the list of references. Checkpoint\_C: Child Health CheckPoint data of children;  
44 Checkpoint\_P: Child Health CheckPoint data of parents.  
45  
46  
47  
48  
49

### 50 **SUPPLEMENTARY DOCUMENTS:**

#### 51 52 **Supplementary table 1. Epidemiology of studies reporting retinal vascular calibre** 53 54 55 56 57 58 59 60

## REFERENCES

1. Levy BI AG, Pries AR, Struijker-Boudier HA. Microcirculation in Hypertension A New Target for Treatment? . *Circulation* 2001;104(6):735-40. doi: <https://doi.org/10.1161/hc3101.091158>
2. Feihl F LL, Waeber B and Levy BI. Hypertension. A Disease of the Microcirculation? *Hypertension* 2006;48:1-7. doi: <http://doi.org/10.1161/01.HYP.0000249510.20326.72>
3. Granger DN, Rodrigues SF, Yildirim A, et al. Microvascular responses to cardiovascular risk factors. *Microcirculation*;17(3):192-205.
4. Sasongko MB, Wong TY, Wang JJ. Retinal arteriolar changes: intermediate pathways linking early life exposures to cardiovascular disease? *Microcirculation* 2010;17(1):21-31. doi: <http://dx.doi.org/10.1111/j.1549-8719.2009.00007.x>
5. Hughes AD. Genetic and early life influences on the human retinal microcirculation. *Basic Clin Pharmacol Toxicol* 2012;110(1):19-25. doi: <http://dx.doi.org/10.1111/j.1742-7843.2011.00817.x>
6. Li LJ LY, Wong TY, Cheung CY. . Can the retinal microvasculature offer clues to cardiovascular risk factors in early life? . *Acta Paediatr* 2013;102(10):941-6. doi: <http://dx.doi.org/10.1111/apa.12294>
7. Wong TY, Klein R, Klein B, et al. Retinal Microvascular Abnormalities and their Relationship with Hypertension, Cardiovascular Disease, and Mortality. *Surv Ophthalmol* 2001;46(1):59-80. doi: [http://dx.doi.org/10.1016/S0039-6257\(01\)00234-X](http://dx.doi.org/10.1016/S0039-6257(01)00234-X)
8. Liew G, Wang JJ, Mitchell P, et al. Retinal vascular imaging: a new tool in microvascular disease research. *Circulation Cardiovascular imaging* 2008;1(2):156-61. doi: <http://doi.org/10.1161/CIRCIMAGING.108.784876>
9. Liew G WJ. Retinal Vascular Signs: A Window to the Heart? *Rev Esp Cardiol (Engl Ed)* 2011;64(6):515-21. doi: <http://doi.org/10.1016/j.recesp.2011.02.014>
10. Ikram MK OY, Cheung CY, Wong TY. Retinal Vascular Caliber Measurements: Clinical Significance, Current Knowledge and Future perspectives. *Ophthalmologica* 2013;229:125-36. doi: <http://doi.org/10.1159/000342158>
11. Sun C, Wang JJ, Mackey DA, et al. Retinal vascular caliber: systemic, environmental, and genetic associations. *Surv Ophthalmol* 2009;54(1):74-95. doi: <http://dx.doi.org/10.1016/j.survophthal.2008.10.003>
12. Mimoun L, Massin P, Steg G. Retinal microvascularisation abnormalities and cardiovascular risk. *Arch Cardiovasc Dis* 2009;102(5):449-56. doi: <http://dx.doi.org/10.1016/j.acvd.2009.02.008>
13. Lee KE, Klein BEK, Klein R, et al. Familial Aggregation of Retinal Vessel Caliber in the Beaver Dam Eye Study. *Invest Ophthalmol Vis Sci* 2004;45(11):3929-33. doi: <http://doi.org/10.1167/iovs.04-0462>
14. Liu YP, Kuznetsova T, Jin Y, et al. Heritability of the retinal microcirculation in flemish families. *Am J Hypertens* 2013;26(3):392-99. doi: <http://dx.doi.org/10.1093/ajh/hps064>
15. Li LJ, Liao J, Fan Q, et al. Familial correlation of retinal vascular caliber in Singapore Chinese. *Invest Ophthalmol Vis Sci* 2013;54(8):5638-42. doi: <http://dx.doi.org/10.1167/iovs.13-12418>
16. Taarnhoj NCB, Larsen M, Sander B, et al. Heritability of retinal vessel diameters and blood pressure: A twin study. *Invest Ophthalmol Vis Sci* 2006;47(8):3539-44. doi: <http://dx.doi.org/10.1167/iovs.05-1372>

17. Fahy SJ, Sun C, Zhu G, et al. The relationship between retinal arteriolar and venular calibers is genetically mediated, and each is associated with risk of cardiovascular disease. *Invest Ophthalmol Vis Sci* 2011;52(2):975-81. doi: <http://dx.doi.org/10.1167/iovs.10-5927>
18. Zheng Y, Huang W, Zhang J, et al. Phenotypic and genetic correlation of blood pressure and body mass index with retinal vascular caliber in children and adolescents: the Guangzhou twin eye study. *Invest Ophthalmol Vis Sci* 2013;54(1):423-8. doi: <http://dx.doi.org/10.1167/iovs.12-9543>
19. Sun C, Zhu G, Wong TY, et al. Quantitative genetic analysis of the retinal vascular caliber: the Australian Twins Eye Study. *Hypertension* 2009;54(4):788-95. doi: <http://dx.doi.org/10.1161/HYPERTENSIONAHA.109.132902>
20. Tenesa A, Haley CS. The heritability of human disease: estimation, uses and abuses. *Nat Rev Genet* 2013;14:139-49. doi: <http://doi.org/10.1038/nrg3377>
21. Ikram MK XS, Jensen RA, Cotch MF, Hewitt AW, Ikram MA. Four Novel Loci (19q13 q, 12q24, and 5q14) Influence the Microcirculation In Vivo. *PLoS ONE.*, 2010;6(10):1-12. Four Novel Loci (19q13, 6q24, 12q24, and 5q14) Influence the Microcirculation In Vivo. *PLoS ONE* 2010;6(10):1-12. doi: <https://doi.org/10.1371/journal.pgen.1001184>
22. Sanson A, Johnstone R. The LSAC Research Consortium & FaCS LSAC Project Team. Growing Up in Australia takes its first steps. *Family Matters* 2004;67:46-53.
23. Edwards B. Growing Up in Australia: The Longitudinal Study of Australian Children Entering adolescence and becoming a young adult. *Family Matters* 2014;95:5-14.
24. Clifford S, Davies S, Wake M. Child Health CheckPoint: Cohort summary and methodology of a physical health and biospecimen module for the Longitudinal Study of Australian Children. *Submitted to BMJ Open October 2017* doi: <https://doi.org/10.25374/MCRI.5687590>
25. Wake M, Clifford S, York E, et al. Introducing Growing Up in Australia's Child Health CheckPoint. *Family Matters* 2014;94:15-23.
26. Knudtson MD LK, Hubbard LD, Wong TY, Klein R, Klein BEK. Revised formulas for summarizing retinal vessel diameters. *Curr Eye Res* 2003;27(3):143-49. doi: <https://doi.org/10.1076/ceyr.27.3.143.16049>
27. Wong TY KM, Klein R, Klein BEK, Meuer SM, Hubbard LD. Computer-assisted measurement of retinal vessel diameters in the Beaver Dam Eye Study: Methodology, Correlation between Eyes, and Effect of Refractive Errors. *Ophthalmology* 2004;111(6):1183-90. doi: <http://doi.org/10.1016/j.ophtha.2003.09.039>
28. Kuczmarski RJ OC, Guo SS, et al. 2000 CDC Growth Charts for the United States: methods and development. *Vital Health Stat 11* 2002:1-190.
29. Australian-Bureau-of-Statistics. Census of Population and Housing: Socio-Economic Indexes for Areas (SEIFA) 2011;(cat. no. 2033.0.55.001) [Available from: <http://www.abs.gov.au/websitedbs/censushome.nsf/home/seifa2011>
30. Heeringa SG WB, Berglund PA. Applied survey data analysis. Boca Raton, FL: CRC Press 2010.
31. Ellul S HR, Mensah FK, Carlin JB. Longitudinal Study of Australian Children's Child Health CheckPoint Technical Paper 1: Weighting and Non-Response. 2018 doi: <https://doi.org/10.25374/MCRI.5687593>
32. Cheung N SS, Liew G, Liu EY, Hodgson L, Mitchell P, Wong TY. Childhood Vascular Risk Factors and Retinal Vessel Caliber. *Asia Pac J Ophthalmol (Phila)* 2012;1:193-7. doi: <http://doi.org/10.1097/APO.0b013e31825e4d79>

- 1  
2  
3 33. Von Hanno T, Bertelsen G, Sjolie AK, et al. Retinal vascular calibres are significantly  
4 associated with cardiovascular risk factors: the Tromso Eye Study. *Acta Ophthalmol*  
5 2014;92(1):40-6. doi: <http://doi.org/10.1111/aos.12102>  
6  
7 34. Gopinath B BL, Wang JJ, et al. . Blood pressure is associated with retinal vessel signs in  
8 preadolescent children. *J Hypertens* 2010;28:1406-12. doi:  
9 <http://doi.org/10.1097/HJH.0b013e3283395223>  
10  
11 35. Mitchell P, Liew G, Rochtchina E, et al. Evidence of arteriolar narrowing in low-birth-weight  
12 children. *Circulation* 2008;118(5):518-24. doi:  
13 <http://dx.doi.org/10.1161/CIRCULATIONAHA.107.747329>  
14  
15 36. Boillot A, Zoungas S, Mitchell P, et al. Obesity and the microvasculature: a systematic review  
16 and meta-analysis. *PLoS One* 2013;8(2):e52708. doi:  
17 <http://doi.org/10.1371/journal.pone.0052708>  
18  
19 37. Gishti O, Jaddoe VWV, Felix JF, et al. Retinal Microvasculature and Cardiovascular Health in  
20 Childhood. *Pediatrics* 2015;135(4):678-85. doi: <http://doi.org/10.1542/peds.2014-3341>  
21  
22 38. Kawasaki R WJ, Rochtchina E, et al. . Cardiovascular risk factors and retinal microvascular  
23 signs in an adult Japanese population: the funagata study. *Ophthalmology*  
24 2006;113(8):1378-84. doi: <http://doi.org/10.1016/j.ophtha.2006.02.052>  
25  
26 39. Liew G, Sharrett AR, Wang JJ, et al. Relative importance of systemic determinants of retinal  
27 arteriolar and venular caliber: the atherosclerosis risk in communities study. *Arch*  
28 *Ophthalmol* 2008;126(10):1404-10. doi: <http://dx.doi.org/10.1001/archophth.126.10.1404>  
29  
30 40. Wong TY, Islam FM, Klein R, et al. Retinal vascular caliber, cardiovascular risk factors, and  
31 inflammation: the multi-ethnic study of atherosclerosis (MESA). *Invest Ophthalmol Vis*  
32 *Sci* 2006;47(6):2341-50. doi: <http://doi.org/10.1167/iovs.05-1539>  
33  
34 41. Klein R, Klein BEK, Knudtson MD, et al. Are inflammatory factors related to retinal vessel  
35 caliber? The Beaver Dam Eye Study. *Arch Ophthalmol* 2006;124(1):87-94. doi:  
36 <http://doi.org/10.1001/archophth.124.1.87>  
37  
38 42. Kawasaki R, Wang JJ, Rochtchina E, et al. Retinal vessel caliber is associated with the 10-year  
39 incidence of glaucoma: the Blue Mountains Eye Study. *Ophthalmology* 2013;120(1):84-  
40 90. doi: <http://doi.org/10.1016/j.ophtha.2012.07.007>  
41  
42 43. Ikram MK, de Jong FJ, Vingerling JR, et al. Are retinal arteriolar or venular diameters  
43 associated with markers for cardiovascular disorders? The Rotterdam Study. *Invest*  
44 *Ophthalmol Vis Sci* 2004;45(7):2129-34. doi: <http://doi.org/10.1167/iovs.03-1390>  
45  
46 44. Kim DH, Newman AB, Hajjar I, et al. Retinal microvascular signs and functional loss in older  
47 persons: the cardiovascular health study. *Stroke* 2011;42(6):1589-95. doi:  
48 <http://doi.org/10.1161/STROKEAHA.110.605261>  
49  
50 45. Serre KR, Sasongko MB. Modifiable Lifestyle and Environmental Risk Factors Affecting the  
51 Retinal Microcirculation. *Microcirculation* 2012;19(1):29-36. doi:  
52 <http://dx.doi.org/10.1111/j.1549-8719.2011.00121.x>  
53  
54 46. Wong TY WJ, Rochtchina E, Klein R, Mitchell P. Does refractive error influence the  
55 association of blood pressure and retinal vessel diameters? The Blue Mountains Eye Study.  
56 *Am J Ophthalmol* 2004;137(6):1050-5. doi: <http://doi.org/10.1016/j.ajo.2004.01.035>  
57  
58 47. Cheung N TG, Saw SM, Amirul Islam FM, Mitchell P, Wang JJ, Wong TY. Relationship of  
59 axial length and retinal vascular caliber in children. *Ophthalmologica* 2007;144(5):658-62.  
60 doi: <http://doi.org/10.1016/j.ajo.2007.07.023>



- 1  
2  
3 48. Hanssen H, Siegrist M, Neidig M, et al. Retinal vessel diameter, obesity and metabolic risk  
4 factors in school children (JuvenTUM 3). *Atherosclerosis* 2012;221(1):242-8. doi:  
5 <http://dx.doi.org/10.1016/j.atherosclerosis.2011.12.029>  
6  
7 49. Harris PA, Taylor R, Thielke R, et al. Research electronic data capture (REDCap) – A  
8 metadata-driven methodology and workflow process for providing translational research  
9 informatics support. *J Biomed Inform* 2009;42(2):377-81.  
10  
11  
12  
13  
14  
15  
16  
17  
18  
19  
20  
21  
22  
23  
24  
25  
26  
27  
28  
29  
30  
31  
32  
33  
34  
35  
36  
37  
38  
39  
40  
41  
42  
43  
44  
45  
46  
47  
48  
49  
50  
51  
52  
53  
54  
55  
56  
57  
58  
59  
60

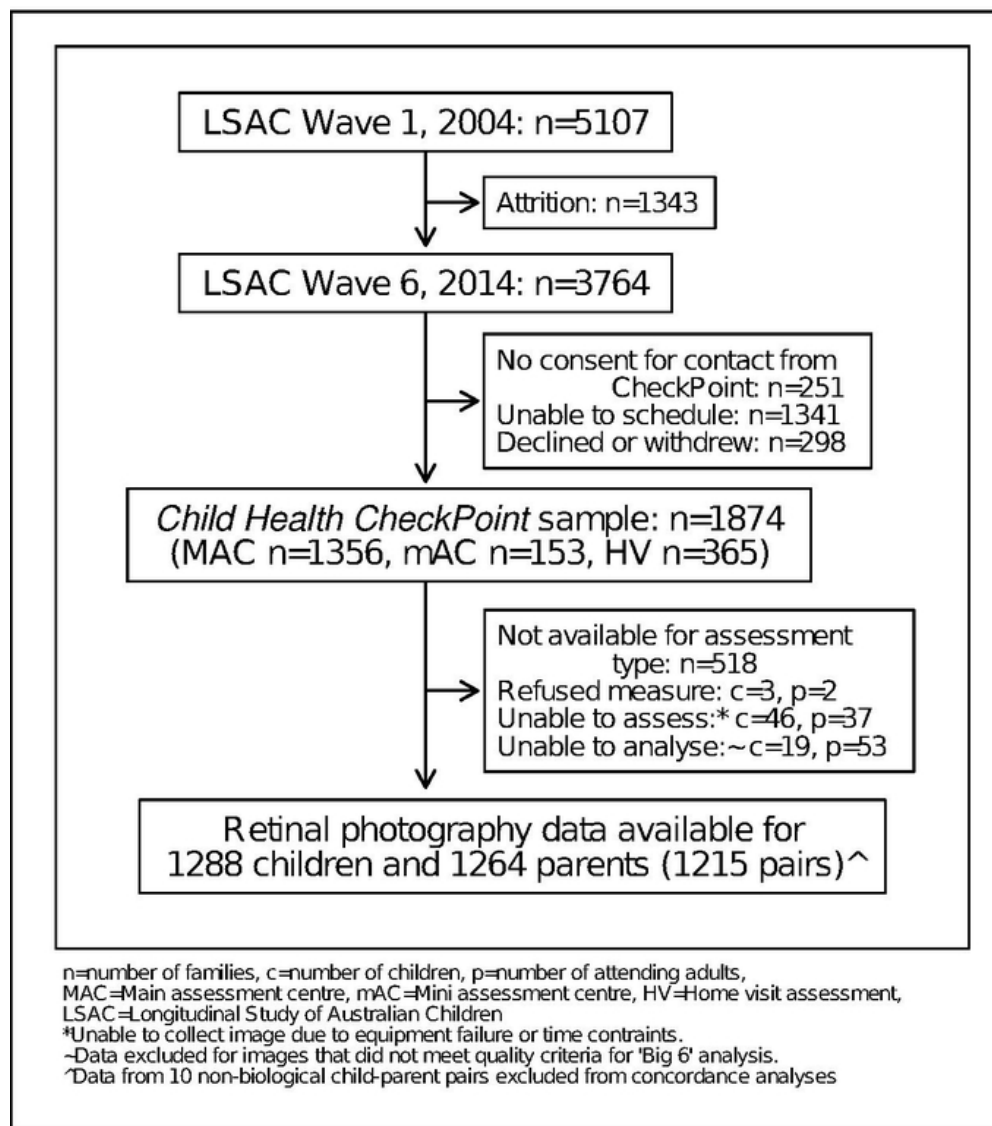

Figure 1. Participant flow through Child Health Check-Point.

n: number of families; c: number of children; p: number of attending adults; MAC: Main assessment centre; mAC: Mini assessment centre; HV: Home visit assessment; LSAC: Longitudinal Study of Australian Children.

\*Unable to collect image due to equipment failure or time constraints.

~Data excluded for images that did not meet quality criteria for 'Big 6' analysis.

^Data from 10 non-biological child-parent pairs excluded from concordance analyses

57x65mm (300 x 300 DPI)

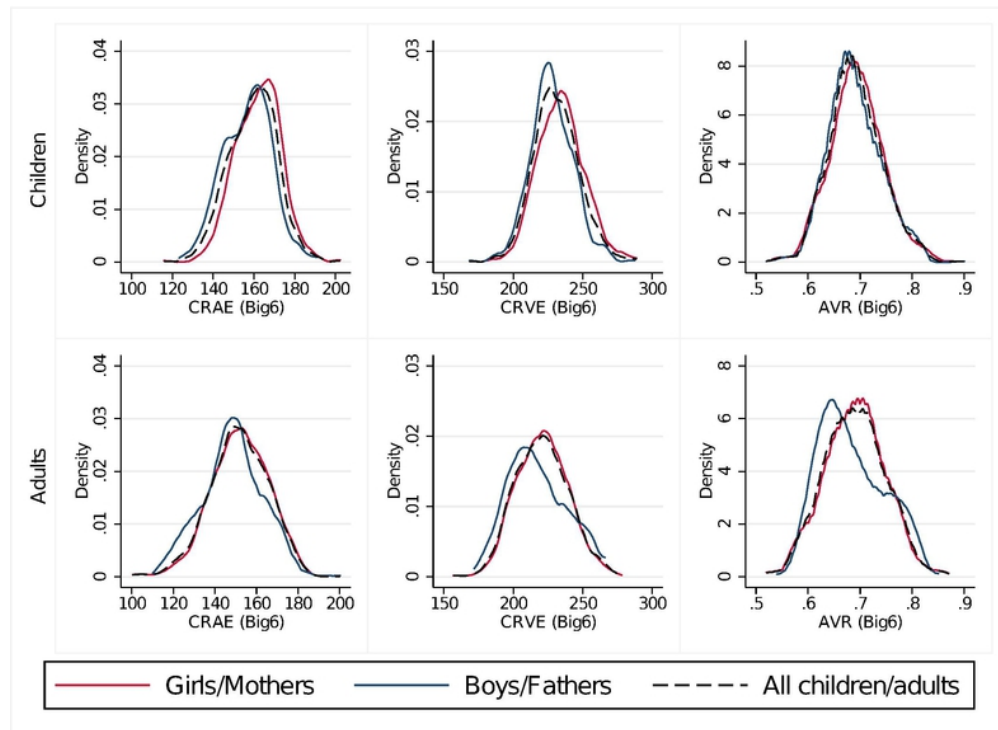

Figure 2. Density plots for retinal vessel calibre measures.

AVR: arteriolar-venular ratio; CRAE: central retinal arteriolar equivalent; CRVE: central retinal venular equivalent; BIG6: revised knudston-parr formula for calculating CRAE and CRVE using IVAN software

66x48mm (300 x 300 DPI)

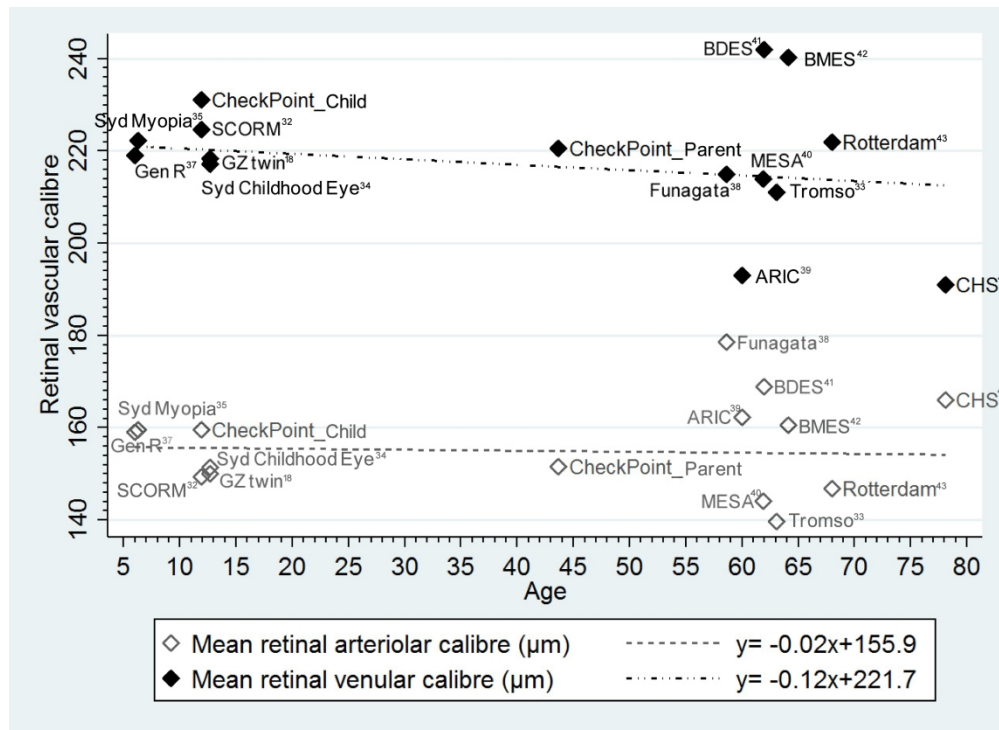

Figure 3. Epidemiology of retinal vascular calibre by age. Mean retinal arteriolar and venular calibre by age from CheckPoint and published community-based studies with n>1000. Each symbol represents the mean value for a single study. Each study is summarised in supplementary table 1, and the paper from which that study's data are drawn is provided in the list of references. Checkpoint\_C: Child Health CheckPoint data of children; CheckPoint\_P: Child Health CheckPoint data of parents.

327x238mm (300 x 300 DPI)

**Supplementary Table 1. Epidemiology of studies reported retinal vascular calibre**

| Author; publication year<br>reference number | Study name; country    | Examination<br>year | Sample<br>size | Mean age<br>(years) | Arteriolar calibre<br>(mean(SD), $\mu\text{m}$ ) | Venular calibre<br>(mean(SD), $\mu\text{m}$ ) |
|----------------------------------------------|------------------------|---------------------|----------------|---------------------|--------------------------------------------------|-----------------------------------------------|
| <b>Children</b>                              |                        |                     |                |                     |                                                  |                                               |
| Gishti; 2015 <sup>37</sup>                   | Gen R; Netherlands     | 2008-2010           | 4007           | 6                   | 159.0 (14.9)                                     | 219.0 (20.2)                                  |
| Mitchell; 2008 <sup>35</sup>                 | Syd Myopia; AU         | 2003-2004           | 1369           | 6.3                 | 159.6 (ns)                                       | 222.3 (ns)                                    |
| Cheung; 2012 <sup>32</sup>                   | SCORM; Singapore       | 2006                | 1225           | 11.9                | 149.3 (12.3)                                     | 224.6 (17.8)                                  |
|                                              | CheckPoint_C; AU       | 2015-2016           | 1288           | 11.9                | 159.5 (11.8)                                     | 231.1 (16.5)                                  |
| Gopinath; 2010 <sup>34</sup>                 | Syd Childhood Eye; AU  | 2004-2005           | 2272           | 12.7                | 151.4 (12.1)                                     | 151.4 (12.1)                                  |
| Zheng; 2013 <sup>18</sup>                    | GZ twin; China         | 2009                | 2070           | 12.7                | 150.1 (13.4)                                     | 218.4 (19.1)                                  |
| <b>Adults</b>                                |                        |                     |                |                     |                                                  |                                               |
|                                              | CheckPoint_P; AU       | 2015-2016           | 1264           | 43.7                | 151.5 (14.0)                                     | 220.6 (19.0)                                  |
| Kawasaki-1; 2006 <sup>38</sup>               | Funagata; Japan        | 2000-2002           | 1481           | 58.6                | 178.6 (21.0)                                     | 214.9 (20.6)                                  |
| Liew; 2008 <sup>39</sup>                     | ARIC; USA              | 1993-1995           | 8794           | 60                  | 162.3 (ns)                                       | 193.1 (ns)                                    |
| Wong; 2006 <sup>40</sup>                     | MESA; USA              | 2002-2004           | 5979           | 61.9                | 144.1 (14.4)                                     | 214.0 (22.2)                                  |
| Klein; 2006 <sup>41</sup>                    | BDES; USA              | 1988-1990           | 4926           | 62                  | 169 (ns)                                         | 242 (ns)                                      |
| Von; 2014 <sup>33</sup>                      | Tromso; Norway         | 2007-2008           | 6353           | 63.1                | 139.7 (14.6)                                     | 211.1 (21.1)                                  |
| Kawasaki-2; 2013 <sup>42</sup>               | BMES; Australia        | 2003                | 2335           | 64.1                | 160.6 (14.9)                                     | 240.3 (22.4)                                  |
| Ikram; 2004 <sup>43</sup>                    | Rotterdam; Netherlands | 1990-1993           | 5674           | 68                  | 146.9 (14.4)                                     | 222.0 (20.9)                                  |
| Kim; 2010 <sup>44</sup>                      | CHS; USA               | 1997-1998           | 1744           | 78.1                | 166 (19)                                         | 191 (18)                                      |

Abbreviations: SD, standard deviation; AU, Australia; USA, United State of America; Gen R, Generation R Study; Syd Myopia, The Sydney Myopia Study; SCORM, Singapore Cohort Study of the Risk Factors for Myopia; CheckPoint\_C, Child Health CheckPoint data of children; Syd Childhood Eye; The Sydney Childhood Eye Study; GZ twin; The Guangzhou twin eye study; CheckPoint\_P, Child Health CheckPoint data of parents; ARIC; Atherosclerosis Risk In Communities; MESA; Multi-Ethnic Study of Atherosclerosis; BDES; Beaver Dam Eye Study; Tromso, The Tromsø Eye Study; BMES; Blue Mountains Eye Study; Rotterdam; The Rotterdam Study; CHS; Cardiovascular Health Study; ns, not stated.

**STROBE 2007 (v4) Statement—Checklist of items that should be included in reports of *cohort studies***

| Section/Topic                | Item # | Recommendation                                                                                                                                                                       | Reported on page # |
|------------------------------|--------|--------------------------------------------------------------------------------------------------------------------------------------------------------------------------------------|--------------------|
| Title and abstract           | 1      | (a) Indicate the study's design with a commonly used term in the title or the abstract                                                                                               | 1, 2               |
|                              |        | (b) Provide in the abstract an informative and balanced summary of what was done and what was found                                                                                  | 3                  |
| <b>Introduction</b>          |        |                                                                                                                                                                                      |                    |
| Background/rationale         | 2      | Explain the scientific background and rationale for the investigation being reported                                                                                                 | 5, 6               |
| Objectives                   | 3      | State specific objectives, including any prespecified hypotheses                                                                                                                     | 6                  |
| <b>Methods</b>               |        |                                                                                                                                                                                      |                    |
| Study design                 | 4      | Present key elements of study design early in the paper                                                                                                                              | 6, 7               |
| Setting                      | 5      | Describe the setting, locations, and relevant dates, including periods of recruitment, exposure, follow-up, and data collection                                                      | 6, 7               |
| Participants                 | 6      | (a) Give the eligibility criteria, and the sources and methods of selection of participants. Describe methods of follow-up                                                           | 6, 7               |
|                              |        | (b) For matched studies, give matching criteria and number of exposed and unexposed                                                                                                  |                    |
| Variables                    | 7      | Clearly define all outcomes, exposures, predictors, potential confounders, and effect modifiers. Give diagnostic criteria, if applicable                                             | 7, 8               |
| Data sources/<br>measurement | 8*     | For each variable of interest, give sources of data and details of methods of assessment (measurement). Describe comparability of assessment methods if there is more than one group | 7, 8               |
| Bias                         | 9      | Describe any efforts to address potential sources of bias                                                                                                                            |                    |
| Study size                   | 10     | Explain how the study size was arrived at                                                                                                                                            | 6, 7, figure 1     |
| Quantitative variables       | 11     | Explain how quantitative variables were handled in the analyses. If applicable, describe which groupings were chosen and why                                                         | 7, 8               |
| Statistical methods          | 12     | (a) Describe all statistical methods, including those used to control for confounding                                                                                                | 9                  |
|                              |        | (b) Describe any methods used to examine subgroups and interactions                                                                                                                  | 9                  |
|                              |        | (c) Explain how missing data were addressed                                                                                                                                          |                    |
|                              |        | (d) If applicable, explain how loss to follow-up was addressed                                                                                                                       |                    |
|                              |        | (e) Describe any sensitivity analyses                                                                                                                                                |                    |
| <b>Results</b>               |        |                                                                                                                                                                                      |                    |

|                          |     |                                                                                                                                                                                                              |                      |
|--------------------------|-----|--------------------------------------------------------------------------------------------------------------------------------------------------------------------------------------------------------------|----------------------|
| Participants             | 13* | (a) Report numbers of individuals at each stage of study—eg numbers potentially eligible, examined for eligibility, confirmed eligible, included in the study, completing follow-up, and analysed            | 10, Figure 1         |
|                          |     | (b) Give reasons for non-participation at each stage                                                                                                                                                         | 7,10, figure 1       |
|                          |     | (c) Consider use of a flow diagram                                                                                                                                                                           | Figure 1             |
| Descriptive data         | 14* | (a) Give characteristics of study participants (eg demographic, clinical, social) and information on exposures and potential confounders                                                                     | 8, 10, table 1       |
|                          |     | (b) Indicate number of participants with missing data for each variable of interest                                                                                                                          | Figure 1             |
|                          |     | (c) Summarise follow-up time (eg, average and total amount)                                                                                                                                                  |                      |
| Outcome data             | 15* | Report numbers of outcome events or summary measures over time                                                                                                                                               | 10, table 1, table 2 |
| Main results             | 16  | (a) Give unadjusted estimates and, if applicable, confounder-adjusted estimates and their precision (eg, 95% confidence interval). Make clear which confounders were adjusted for and why they were included | 13, 14               |
|                          |     | (b) Report category boundaries when continuous variables were categorized                                                                                                                                    |                      |
|                          |     | (c) If relevant, consider translating estimates of relative risk into absolute risk for a meaningful time period                                                                                             |                      |
| Other analyses           | 17  | Report other analyses done—eg analyses of subgroups and interactions, and sensitivity analyses                                                                                                               | 15                   |
| <b>Discussion</b>        |     |                                                                                                                                                                                                              |                      |
| Key results              | 18  | Summarise key results with reference to study objectives                                                                                                                                                     | 15, 16               |
| <b>Limitations</b>       |     |                                                                                                                                                                                                              |                      |
| Interpretation           | 20  | Give a cautious overall interpretation of results considering objectives, limitations, multiplicity of analyses, results from similar studies, and other relevant evidence                                   | 16, 17               |
| Generalisability         | 21  | Discuss the generalisability (external validity) of the study results                                                                                                                                        | 16, 17               |
| <b>Other information</b> |     |                                                                                                                                                                                                              |                      |
| Funding                  | 22  | Give the source of funding and the role of the funders for the present study and, if applicable, for the original study on which the present article is based                                                | 18, 19               |

\*Give information separately for cases and controls in case-control studies and, if applicable, for exposed and unexposed groups in cohort and cross-sectional studies.

**Note:** An Explanation and Elaboration article discusses each checklist item and gives methodological background and published examples of transparent reporting. The STROBE checklist is best used in conjunction with this article (freely available on the Web sites of PLoS Medicine at <http://www.plosmedicine.org/>, Annals of Internal Medicine at <http://www.annals.org/>, and Epidemiology at <http://www.epidem.com/>). Information on the STROBE Initiative is available at [www.strobe-statement.org](http://www.strobe-statement.org).

# BMJ Open

## Retinal microvasculature: Population epidemiology, concordance and reliability in 11-12 year old Australians and their parents

|                                 |                                                                                                                                                                                                                                                                                                                                                                                                                                                                                                                                                                                                                                                                                                                                                                                                                                                                                                                           |
|---------------------------------|---------------------------------------------------------------------------------------------------------------------------------------------------------------------------------------------------------------------------------------------------------------------------------------------------------------------------------------------------------------------------------------------------------------------------------------------------------------------------------------------------------------------------------------------------------------------------------------------------------------------------------------------------------------------------------------------------------------------------------------------------------------------------------------------------------------------------------------------------------------------------------------------------------------------------|
| Journal:                        | <i>BMJ Open</i>                                                                                                                                                                                                                                                                                                                                                                                                                                                                                                                                                                                                                                                                                                                                                                                                                                                                                                           |
| Manuscript ID                   | bmjopen-2018-022399.R1                                                                                                                                                                                                                                                                                                                                                                                                                                                                                                                                                                                                                                                                                                                                                                                                                                                                                                    |
| Article Type:                   | Research                                                                                                                                                                                                                                                                                                                                                                                                                                                                                                                                                                                                                                                                                                                                                                                                                                                                                                                  |
| Date Submitted by the Author:   | 22-Jun-2018                                                                                                                                                                                                                                                                                                                                                                                                                                                                                                                                                                                                                                                                                                                                                                                                                                                                                                               |
| Complete List of Authors:       | <p>Dascalu, Julian ; Murdoch Children's Research Institute<br/> Liu, Mengjiao; Murdoch Children's Research Institute; The University of Melbourne, Department of Paediatrics<br/> Lycett, kate; Murdoch Children's Research Institute; The University of Melbourne, Department of Paediatrics<br/> Grobler, Anneke; Murdoch Children's Research Institute<br/> He, Mingguang; The University of Melbourne, Centre for Eye Research Australia, Royal Victorian Eye and Ear Hospital<br/> Burgner, David; Murdoch Children's Research Institute; The University of Melbourne, Department of Paediatrics<br/> Wong, , Tien Yin ; The University of Melbourne, Centre for Eye Research Australia, Royal Victorian Eye and Ear Hospital; Singapore National Eye Centre, Singapore Eye Research Institute<br/> Wake, Melissa; Murdoch Children's Research Institute; The University of Melbourne, Department of Paediatrics</p> |
| <b>Primary Subject Heading</b>: | Epidemiology                                                                                                                                                                                                                                                                                                                                                                                                                                                                                                                                                                                                                                                                                                                                                                                                                                                                                                              |
| Secondary Subject Heading:      | Paediatrics, Public health, Cardiovascular medicine, Ophthalmology                                                                                                                                                                                                                                                                                                                                                                                                                                                                                                                                                                                                                                                                                                                                                                                                                                                        |
| Keywords:                       | Retinal vessel calibre, Retinal vessels, Reference values, Children, Inheritance patterns, Epidemiologic studies                                                                                                                                                                                                                                                                                                                                                                                                                                                                                                                                                                                                                                                                                                                                                                                                          |
|                                 |                                                                                                                                                                                                                                                                                                                                                                                                                                                                                                                                                                                                                                                                                                                                                                                                                                                                                                                           |

SCHOLARONE™  
Manuscripts



1  
2  
3 **Retinal microvasculature: Population epidemiology, concordance and reliability in 11-**  
4 **12 year old Australians and their parents**  
5  
6

7 **Authors:** Julian Dascalu,<sup>1</sup> Mengjiao Liu,<sup>1,2</sup> Kate Lycett,<sup>1,2</sup> Anneke Grobler,<sup>1</sup> Mingguang He,<sup>3</sup>  
8 David Burgner,<sup>1,2,4</sup> Tien Wong,<sup>3,5,6</sup> Melissa Wake.<sup>1,2,7</sup>  
9  
10

11 **Affiliations:** <sup>1</sup>Murdoch Children's Research Institute, Parkville, Victoria, Australia;  
12 <sup>2</sup>Department of Paediatrics, The University of Melbourne, Parkville, Victoria, Australia; <sup>3</sup>  
13 Centre for Eye Research Australia, The University of Melbourne, Royal Victorian Eye and  
14 Ear Hospital, East Melbourne, Australia; <sup>4</sup>Department of Paediatrics, Monash University,  
15 Clayton, Victoria, Australia; <sup>5</sup>Singapore Eye Research Institute, Singapore National Eye  
16 Centre, Singapore; <sup>6</sup>Duke-NUS Medical School, National University of Singapore, Singapore;  
17 <sup>7</sup>Department of Paediatrics & The Liggins Institute, The University of Auckland, Auckland,  
18 New Zealand.  
19  
20  
21  
22  
23  
24  
25

26  
27 **Corresponding author:** Prof. Melissa Wake  
28  
29 Murdoch Children's Research Institute  
30  
31 The Royal Children's Hospital  
32  
33 50 Flemington Road, Parkville 3052, VIC Australia.  
34  
35 Telephone: +61 3 9345 5761  
36  
37 Email: melissa.wake@mcri.edu.au  
38  
39

40 **Keywords:** Retinal vessel calibre, retinal vessels, epidemiology, reference values, parents,  
41 children, inheritance patterns, correlation studies, epidemiologic studies, cross-  
42 sectional studies  
43  
44  
45

46  
47 **Word count:** 3640  
48  
49

50 **Abbreviations:** AVR: arteriolar-venular ratio; BIG6: revised Knudston-Parr formula for  
51 calculating CRAE and CRVE using IVAN software; BMI: body mass index; CC: Pearson's  
52 correlation coefficient; CI: confidence interval; CRAE: central retinal arteriolar equivalent;  
53 CRVE: central retinal venular equivalent; GWAS: Genome wide association studies; HV:  
54 home visit assessment; IVAN: Interactive Vessel Analysis software; LSAC: Longitudinal  
55  
56  
57  
58

1  
2  
3 Study of Australian Children; n: number of participants; RC: estimated regression coefficient;  
4 SCORM: Singapore Cohort Study of the Risk Factors for Myopia; SD: standard deviation.  
5  
6  
7  
8  
9  
10  
11  
12  
13  
14  
15  
16  
17  
18  
19  
20  
21  
22  
23  
24  
25  
26  
27  
28  
29  
30  
31  
32  
33  
34  
35  
36  
37  
38  
39  
40  
41  
42  
43  
44  
45  
46  
47  
48  
49  
50  
51  
52  
53  
54  
55  
56  
57  
58  
59  
60

## ABSTRACT

**Objectives:** To describe distributions and concordance of the retinal microvasculature measurements in a population-based sample of Australian parent-child dyads at child age 11-12 years.

**Design:** Cross-sectional Child Health CheckPoint study, between Waves 6 and 7 of the national population-based Longitudinal Study of Australian Children (LSAC).

**Setting:** Assessment centres in seven Australian cities, February 2015-March 2016.

**Participants:** Of all 1874 participating families, 1288 children (51% girls) and 1264 parents (87% mothers, mean age 43.7) were analysed. Diabetic participants and non-biological pairs were excluded from concordance analyses.

**Outcome measures:** Retinal photographs were taken by non-mydriatic fundus camera. Trained graders scored vascular calibre using semi-automated software, yielding estimates of central retinal arteriolar and venular equivalents (CRAE, CRVE) and arteriolar-venular ratio (AVR). Pearson's correlation coefficients and multivariable linear regression models assessed parent-child concordance. Survey weights and methods accounted for LSAC's complex sampling, stratification and clustering within postcodes.

**Results:** Mean (standard deviations) of CRAE and CRVE were larger in children (159.5 (11.8) and 231.1 (16.5) $\mu\text{m}$ , respectively) than parents (151.5 (14.0) and 220.6 (19.0) $\mu\text{m}$ ), yielding similar AVR (children 0.69 (0.05), parents 0.69 (0.06)). Correlation coefficients for parent-child pairs were 0.22 (95% CI 0.16 to 0.27) for CRAE, 0.23 (95% CI 0.17 to 0.28) for CRVE and 0.18 (95% CI 0.13 to 0.24) for AVR. Mother-child and father-child values were similar (0.20 and 0.32 for CRAE, 0.22 and 0.29 for CRVE, respectively). Relationships attenuated slightly on adjustment for age, sex, blood pressure, diabetes and body mass index. Percentiles and concordance are presented for the whole sample and by sex.

**Conclusions:** Arteriolar and venular calibre were similar to previously documented measures in midlife adult and late childhood populations. Population parent-child concordance values align with moderate polygenic heritability reported in smaller studies.

## STRENGTHS AND LIMITATIONS OF THIS STUDY

- This is the largest Australian population-based study to investigate concordance of microvascular structural measurements
- Our adult sample provides novel data regarding the relatively neglected mid-life phase, with most other adult population samples being elderly
- We used gold-standard methodology and demonstrated high inter- and intra-rater reliability
- Most of the participating parents were mothers, resulting in less precise descriptive and concordance estimates for fathers

## INTRODUCTION

The role of the microvasculature (ie small vessels) is increasingly recognised in the pathogenesis of cardiovascular disease.<sup>1-3</sup> Microvascular abnormalities already present in early life are thought to predispose to both cardiovascular risk factors and outcomes (eg stroke, myocardial infarction).<sup>4-6</sup>

The retina offers a fast, non-invasive platform to study microvascular health *in vivo*, with similar pathological changes associated with abnormalities and diseases in the cerebral, coronary and renal microvasculatures.<sup>7-10</sup> The most commonly assessed retinal microvasculature measure is the vessel calibre (diameter),<sup>10</sup> summarised as the central retinal arteriolar and venular equivalents (CRAE, CRVE) and its ratio, the arteriolar-venular ratio (AVR). Meta-analyses have demonstrated statistically significant correlations of smaller retinal arteriolar and wider retinal venular vessel calibre, with subsequent cardiovascular disease, including stroke, obesity and coronary heart disease.<sup>11-14</sup> Cardiovascular risk factors (such as hypertension, diabetes mellitus and obesity) have been similarly associated with smaller retinal arterioles and larger retinal venules via both shared and unique underlying pathophysiology.<sup>6, 15, 16</sup> Thus, the retinal vasculature has been suggested to be a robust biomarker of cardio-metabolic diseases and allows studying the natural course of small vessel changes over life and its relationship to cardiovascular outcomes in later years.<sup>10, 15</sup>

However, an important gap in the literature is that the natural course and determinants of the retinal vascular calibre is not fully documented. There is some evidence for distinct but differing curvilinear relationships of arteriolar and venular calibres with age.<sup>10, 15</sup> Thus, from disparate cross-sectional studies, Ikram's 2012 narrative review reported that both arteriolar and venular calibre increased from birth (85.5 and 130.0  $\mu\text{m}$  respectively) to age 6 years (165.6 and 232.0  $\mu\text{m}$ ). Arteriolar calibre increased further by midlife (202.3  $\mu\text{m}$ ) while venular calibre remained static, with calibres of both arterioles and venules reduced from midlife to old age.<sup>10</sup> However, limitations to this literature include differing protocols for imaging and scoring and a marked under-representation of population studies, with few data from young and mid-adulthood. These limitations preclude robust conclusions regarding reference ranges and predictive cutpoints across the lifespan.

While heritability of retinal vascular calibres appears substantial from small community-based samples using a variety of protocols,<sup>15</sup> large studies of parent-child pairs drawn from the general population are lacking. Parent-child correlations for CRAE and CRVE respectively were 0.24 and 0.27 in 341 American adult pairs (aged 43-86 years) in the Beaver Dam Eye

1  
2  
3 Study;<sup>17</sup> 0.13 and 0.20 for 174 adult pairs from the Flemish Study on Environment, Genes and  
4 Health Outcomes (aged 20+ years)<sup>18</sup> and 0.12 and 0.31 in 304 pairs from the Strabismus,  
5 Amblyopia and Refractive Error in Singaporean Children study (mean ages 40 years for  
6 parents, 9 years for children).<sup>19</sup> In all three studies spousal concordance was negligible for  
7 both metrics. In contrast, monozygotic twins have shown much higher concordance (CRAE  
8 0.60 to 0.80, CRVE 0.63 to 0.88) than dizygotic pairs (CRAE 0.12 to 0.50 and CRVE 0.13 to  
9 0.35),<sup>20-23 24</sup> with higher heritability estimates in twin (CRAE 0.56 to 0.70, CRVE 0.64 to  
10 0.83) than parent-child pairs (CRAE 0.25 to 0.54, CRVE 0.28 to 0.72).<sup>17-23</sup> Genome-wide  
11 studies have identified several promising loci associated with retinal vessel calibre.<sup>23, 25</sup>  
12 However, it remains unclear whether these values remain constant across the lifecourse or  
13 what opportunities these offer for preventive health.  
14  
15  
16  
17  
18  
19  
20

21 Thus, understanding the population epidemiology of retinal calibre in larger studies of healthy  
22 mid-life adults and children would inform age- and sex-specific reference values and facilitate  
23 secular trend analyses, international comparisons and, potentially, early risk stratification. The  
24 Child Health Check Point, a cross-sectional biophysical assessment nested within the  
25 Longitudinal Study of Australian Children (LSAC), provided an opportunity to address this  
26 issue/question in a national population-based sample of Australian parent-child dyads at child  
27 age 11-12 years. We aimed to (1) assess the distribution of retinal vessel calibre in both age  
28 groups, and (2) investigate parent-child concordance of these measures. Additionally, we  
29 provide intra- and inter-grader reliability estimates to quantify reliability and measurement  
30 error.  
31  
32  
33  
34  
35  
36  
37  
38  
39

## 40 METHODS

41  
42 **Study Design and Participants:** Details of the initial LSAC study design and recruitment are  
43 outlined elsewhere.<sup>26, 27</sup> Briefly, LSAC recruited a nationally representative birth cohort (B  
44 cohort) of 5107 infants using a 2-stage clustered design. First, 10% of Australian postcodes  
45 (stratified by state and urban/rural locations) were randomly selected, then in-age children  
46 (born between March 2003 and February 2004) within those enrolled in the Medicare  
47 Australia database (Australia's universal healthcare system, into which 98% of children are  
48 enrolled by their first birthday) were selected. Study participants were then followed up in  
49 biennial 'waves' of data collection up to 2015.<sup>27</sup> The initial recruitment rate in 2004 was  
50 57.2%, of whom 73.7% (n=3764) were retained to LSAC wave 6 in 2014. At the wave 6 visit,  
51 all contactable and consenting families (n=3513) were invited to consent to their contact  
52  
53  
54  
55  
56  
57  
58  
59

1  
2  
3 details being shared with the Child Health CheckPoint team. In 2015, families that consented  
4 to contact were sent an information pack via post and received an information and recruitment  
5 phone call. The CheckPoint's detailed cross-sectional biophysical assessment, nested between  
6 LSAC waves 6 and 7 at child age 11-12 years, took place between February 2015 and March  
7 2016. 1874 families participated. A more detailed description of the CheckPoint study design  
8 is available elsewhere.<sup>28,29</sup>

9  
10  
11  
12  
13 **Ethics and Consent:** The CheckPoint data collection protocol was approved by The Royal  
14 Children's Hospital Melbourne Human Research Ethics Committee (33225D) and The  
15 Australian Institute of Family Studies Ethics Committee (14-26). The attending  
16 parents/caregivers provided written informed consent for themselves and their children to  
17 participate in the study.

18  
19  
20  
21 **Procedure: Retinal imaging:** Retinal photographs were performed during each participant's  
22 3.5-hour visit to the CheckPoint assessment centres in 7 large cities (mainly state capitals)  
23 around Australia. During this 3.5 hour visit, each child and parent rotated sequentially and  
24 separately through a number of 15-minute assessment stations.<sup>28</sup> At the "See Here" station,  
25 participants sat in front of a fundus camera (EOS 60D SLR) while the procedure was  
26 explained; the room was then darkened while the participant rested chin and forehead on the  
27 head rest of the fundus camera for several minutes. Two digital photographs (one each  
28 centering on the optic disc and macula) were taken for each eye using standard protocols from  
29 the Centre for Eye Research Australia. Because CheckPoint was unable to transport its single  
30 retinal camera to smaller regional centres or home visits, 518 CheckPoint families did not  
31 contribute retinal vessel calibre data (figure 1).

32  
33  
34  
35  
36  
37  
38  
39  
40 **Measures: Image scoring:** Right eye images were selected as first choice for scoring.  
41 Reasonable correlations ( $r > 0.71$ ) of retinal vascular diameters between right and left eyes  
42 have previously been reported,<sup>30, 31</sup> and this allowed harmonisation with other vascular  
43 measures obtained in CheckPoint, such as pulse wave velocity and blood pressure, that also  
44 assessed the right-sided circulation. Left eye images were used where right eye images were  
45 deemed ungradable. Issues preventing grading of images included poor focus (potentially  
46 blurring vessel edges), dark images (increasing the difficulty for graders to visually validate  
47 the vessel trace), and confounding pathology (which can obscure the vessels). Images were  
48 evaluated at the Zhongshan Ophthalmic Centre in Guangdong, China (77%) and the Centre  
49 for Eye Research Australia in Melbourne, Australia (23%), separately. In total, 2624 images  
50 were graded, including from 1307 children and 1317 parents (87% and 92% from the right  
51  
52  
53  
54  
55  
56  
57  
58  
59  
60

1  
2  
3 eye for children and parents, respectively). 19 child and 53 parent images did not meet the  
4 quality criteria for use in analyses.  
5

6 Each image was graded by one of four experienced graders (two from China and two from  
7 Australia) masked to participant characteristics measured the diameters of retinal vessels  
8 using the software program Integrative Vessel Analysis (IVAN, University of Wisconsin,  
9 Madison, USA). Retinal vessels were identified as arterioles or venules from a specific area  
10 (one-half to one disc diameter from the margin of the optic disc). Each grader then selected a  
11 segment of each vessel within this area for measurement. Diameters of all the selected  
12 segments were measured automatically by the IVAN software. For each participant, summary  
13 estimates of the average retinal vascular calibre were calculated according to the Big-Six  
14 (revised Knudston-Parr) formula,<sup>30</sup> which combines measurements of the six largest arterioles  
15 or venules, represented as the CRAE and CRVE. The AVR was calculated as CRVE divided  
16 by the CRAE.  
17  
18  
19  
20  
21  
22  
23

24 ***Other sample characteristics:*** Measures of potential confounding variables were included as  
25 detailed elsewhere.<sup>28</sup> Briefly, age was calculated to nearest week using date of birth, either  
26 imported from Medicare Australia's database at the time of LSAC enrolment (child) or self-  
27 reported (parent), and date of assessment. Sex was self-reported.  
28  
29  
30

31 Body mass index (BMI) was calculated as  $\text{kg/m}^2$  using measured height and weight.<sup>28</sup> For  
32 children, an age- and sex-adjusted BMI z-score was calculated using the US Centers for  
33 Disease Control and Prevention growth reference charts.<sup>32</sup>  
34  
35  
36

37 Brachial blood pressure was measured using the SphygmoCor XCEL (AtCor Medical Pty  
38 Ltd., West Ryde, NSW, Australia), following seven minutes rest. Mean arterial blood pressure  
39 was calculated from the systolic and diastolic measures.  
40  
41

42 In Australia, Socio-Economic Indexes for Areas provide standardised scores for  
43 socioeconomic position by geographic area (postcode of family domicile) compiled from  
44 2011 Australian Census data. We used the Socio-Economic Indexes for Areas Index of  
45 Relative Socioeconomic Disadvantage (Disadvantage Index) which numerically summarises  
46 the social and economic conditions of Australian neighbourhoods (national mean of 1000 and  
47 standard deviation (SD) of 100, where higher values represent less disadvantage).<sup>33</sup> Parents  
48 reported child and parent past medical histories via iPad-administered questionnaires at the  
49 Assessment Centre.  
50  
51  
52  
53  
54

55 Child and parent participants who attended CheckPoint assessment centres also completed a  
56 visual acuity assessment (not conducted in home visits). As part of this assessment, they were  
57  
58  
59



1  
2  
3 asked if they "usually wear glasses or contact lenses". Staff members recorded their response  
4 as yes or no; the strength of prescription was not captured.  
5

6 **Statistical analyses:** All analyses were performed using Stata (14.2). Aim 1: Continuous  
7 descriptive variables were summarised using weighted means and standard deviations (SD);  
8 categorical variables were summarised by number and weighted percentage for children and  
9 adults separately and by gender. Survey weights were calculated taking into account the  
10 selection probability of each child, and were adjusted for non-response, loss to follow-up and  
11 benchmarked to population numbers in major (post stratification) categories of the population  
12 of children born in 2004. Standard errors were calculated taking into account the complex  
13 design and survey weights.<sup>34</sup> More details on the calculation of survey weights is provided  
14 elsewhere.<sup>28, 35</sup>  
15

16  
17  
18 Aim 2: Concordance between parents and children was assessed by 1) Pearson's correlation  
19 coefficients with 95% confidence intervals (CI); 2) linear regression with child variable as  
20 dependent variable and parent variable as independent variable adjusted for parent and child  
21 age, BMI, mean arterial blood pressure, family disadvantage index score and sex where  
22 appropriate; and 3) partial correlation coefficients adjusted for the same covariates. The  
23 Pearson's correlation and linear regression analyses were repeated using weighted multi-level  
24 survey analyses; as these yielded similar results, unweighted results are displayed. Twenty  
25 nine diabetic participants, and 10 non-biological child-parent pairs were excluded from  
26 concordance analyses.  
27  
28

29  
30  
31 **Reliability of retinal vessel calibre measurements:** Inter-grader reliability was assessed by  
32 three of the four graders reanalysing a subset of 50 randomly chosen images. To assess intra-  
33 grader reliability, the same three graders each re-graded 25 of the 50 randomly chosen  
34 images. Hence, an assessment was made as to reproducibility of grading made by different  
35 graders and repeatability of gradings made by the same grader. Two-way mixed-effects  
36 intraclass correlation coefficients were used for the reliability analysis.  
37

38  
39  
40 **Patient and Public Involvement:** Because LSAC is a population-based longitudinal study,  
41 no patient groups were involved in its design or conduct. To our knowledge, the public was  
42 not involved in the study design, recruitment or conduct of LSAC study or its CheckPoint  
43 module. Parents received a summary health report for their child and themselves at or soon  
44 after the assessment visit. They consented to take part knowing that they would not otherwise  
45 receive individual results about themselves or their child.  
46  
47  
48  
49  
50  
51  
52  
53  
54  
55  
56  
57  
58  
59  
60

## RESULTS

**Sample characteristics:** A total of 2552 participants (1288 children and 1264 adults) were included in the descriptive Aim 1 analyses (figure 1). This represents 95% of the 1356 pairs who attended CheckPoint assessment centres (where retinal photography was offered). Reasons for participants not having retinal photography images and data are attendance at smaller assessment centres without a retinal camera or home visit (n=518 participants), participant refusal (n=160 participants), and an image not able to be taken (eg the camera required repair) or the quality was too poor (n=5 participants, figure 1). A total of 1186 parent-child pairs were included in Aim 2 analyses; 10 non-biologic adult-child pairs and 29 diabetic participants were excluded from the concordance assessments (figure 1).

Table 1 shows sample characteristics of children and parents stratified by sex. In children, sex was evenly represented (51% girls), while mean age- and sex-specific BMI z-scores were higher than Center for Disease Control historical norms (0.37). The parent sample largely comprised mothers (86.6%), with participants on average being slightly more advantaged (Disadvantage Index mean score 1009, SD 69) than the national Australian population (mean 1000, SD 100).<sup>33</sup>

**Descriptive epidemiology of retinal vessel calibre:** Summary statistics for parent and child retinal values are displayed in table 1, and broken down for reference into 5<sup>th</sup> to 95<sup>th</sup> percentiles in table 2. The corresponding distribution graphs (figure 2) demonstrate approximately normal distribution in all measures for both children and adults. Mean (standard deviations) of CRAE and CRVE were around 0.6 standard deviation larger in children (159.5 (11.8) and 231.1 (16.5) $\mu\text{m}$ , respectively) than parents (151.5 (14.0) and 220.6 (19.0) $\mu\text{m}$ ), yielding similar AVR (children 0.69 (0.05), parents 0.69 (0.06)), table 1). Boys' CRAE and CRVE mean values were marginally smaller than girls' values (CRAE 156.8 $\mu\text{m}$  vs 162.1 $\mu\text{m}$ , CRVE 227.8 $\mu\text{m}$  vs 234.3 $\mu\text{m}$ ), and fathers similarly showed smaller mean values than mothers (CRAE 148.4 $\mu\text{m}$  vs 152.0 $\mu\text{m}$ , CRVE 217.9 $\mu\text{m}$  vs 221.0 $\mu\text{m}$ ). Mean AVR was strikingly similar in parents and children, and between all four groups.

**Table 1. Sample characteristics and retinal vessel calibre measures, stratified by sex, of children and parents**

| Sample characteristics                               | Mean (SD) <sup>*</sup> |                |                 |
|------------------------------------------------------|------------------------|----------------|-----------------|
|                                                      | All                    | Male           | Female          |
| <b>Children<sup>†</sup></b>                          | <b>(n=1288)</b>        | <b>(n=633)</b> | <b>(n=655)</b>  |
| Age, years                                           | 11.96 (0.4)            | 11.96 (0.4)    | 11.96 (0.4)     |
| BMI, kg/m <sup>2</sup>                               | 19.4 (3.6)             | 19.2 (3.6)     | 19.6 (3.6)      |
| BMI z-score                                          | 0.37 (1.0)             | 0.37 (1.0)     | 0.38 (1.0)      |
| Systolic blood pressure, mmHg                        | 108.7 (8.2)            | 108.3 (8.4)    | 109.1 (7.9)     |
| Diastolic blood pressure, mmHg                       | 63.3 (5.7)             | 63.0 (6.1)     | 63.6 (5.2)      |
| Neighbourhood disadvantage index                     | 1011.2 (61.0)          | 1009.6 (63.2)  | 1012.8 (58.8)   |
| Diabetes (%)                                         | 0.4                    | 0.2            | 0.6             |
| Eye condition or glasses/contact lenses (%)          | 20.9                   | 17.9           | 23.8            |
| <i>Retinal vessel measures</i>                       |                        |                |                 |
| Central retinal arteriolar equivalent, $\mu\text{m}$ | 159.5 (11.8)           | 156.8 (11.8)   | 162.1 (11.2)    |
| Central retinal venular equivalent, $\mu\text{m}$    | 231.1 (16.5)           | 227.8 (15.6)   | 234.3 (16.8)    |
| Arteriolar-venular ratio                             | 0.69 (0.05)            | 0.69 (0.05)    | 0.69 (0.05)     |
| <b>Parents<sup>‡</sup></b>                           | <b>(n=1264)</b>        | <b>(n=169)</b> | <b>(n=1095)</b> |
| Age, years                                           | 43.7 (5.6)             | 46.2 (6.5)     | 43.4 (5.3)      |
| BMI, kg/m <sup>2</sup>                               | 28.4 (6.5)             | 28.7 (4.2)     | 28.3 (6.7)      |
| Systolic blood pressure, mmHg                        | 120.5 (12.9)           | 128.4 (11.6)   | 119.3 (12.7)    |
| Diastolic blood pressure, mmHg                       | 73.8 (8.8)             | 78.3 (8.4)     | 73.1 (8.6)      |
| Diabetes (%)                                         | 2.9                    | 5.3            | 2.6             |
| Eye condition or glasses/contact lenses (%)          | 53.2                   | 47.0           | 54.12           |
| <i>Retinal vessel measures</i>                       |                        |                |                 |
| Central retinal arteriolar equivalent, $\mu\text{m}$ | 151.5 (14)             | 148.4 (14.3)   | 152.0 (13.8)    |
| Central retinal venular equivalent, $\mu\text{m}$    | 220.6 (19)             | 217.9 (21.3)   | 221.0 (18.6)    |
| Arteriolar-venular ratio                             | 0.69 (0.06)            | 0.68 (0.06)    | 0.69 (0.06)     |

<sup>\*</sup>Mean (SD), unless otherwise specified; <sup>†</sup>n for each child variable ranges from 1213-1288; <sup>‡</sup>n for each parent variable ranges from 1169-1264. SD, standard deviation; BMI, Body Mass Index

Table 2. Retinal vessel calibre percentiles

| Retinal calibre                                                        | Child |       |       |       |       |       |       | Parent |       |       |       |       |       |        |
|------------------------------------------------------------------------|-------|-------|-------|-------|-------|-------|-------|--------|-------|-------|-------|-------|-------|--------|
|                                                                        | P5    | P10   | P25   | P50   | P75   | P90   | P95   | P5     | P10   | P25   | P50   | P75   | P90   | P95    |
| <b>Central retinal arteriolar equivalent, <math>\mu\text{m}</math></b> |       |       |       |       |       |       |       |        |       |       |       |       |       |        |
| Male                                                                   | 137.1 | 141.5 | 148.0 | 158.0 | 165.1 | 170.7 | 174.2 | 123.6  | 128.7 | 139.9 | 148.3 | 158.2 | 167.2 | 171.6  |
| Female                                                                 | 143.8 | 147.3 | 153.8 | 162.5 | 169.9 | 175.3 | 179.3 | 128.8  | 134.8 | 143.3 | 152.1 | 162.3 | 169.1 | 174.0  |
| All                                                                    | 139.8 | 144.0 | 151.3 | 160.2 | 167.6 | 173.1 | 178.5 | 128.1  | 134.1 | 143.0 | 151.4 | 161.7 | 169.0 | 173.7  |
| <b>Central retinal venular equivalent, <math>\mu\text{m}</math></b>    |       |       |       |       |       |       |       |        |       |       |       |       |       |        |
| Male                                                                   | 203.3 | 208.9 | 217.7 | 226.7 | 237.4 | 247.4 | 252.7 | 186.8  | 190.9 | 202.1 | 215.4 | 231.5 | 247.6 | 261.54 |
| Female                                                                 | 208.8 | 213.3 | 222.6 | 234.0 | 245.4 | 256.8 | 262.8 | 192.3  | 197.5 | 208.4 | 220.8 | 233.8 | 244.8 | 253.0  |
| All                                                                    | 206.1 | 210.8 | 220.4 | 230.4 | 241.4 | 252.1 | 259.3 | 190.9  | 196.8 | 207.2 | 220.2 | 233.7 | 245.7 | 253.0  |
| <b>Arteriolar-venular ratio</b>                                        |       |       |       |       |       |       |       |        |       |       |       |       |       |        |
| Male                                                                   | 0.61  | 0.63  | 0.66  | 0.69  | 0.72  | 0.76  | 0.78  | 0.6    | 0.61  | 0.64  | 0.67  | 0.73  | 0.78  | 0.79   |
| Female                                                                 | 0.61  | 0.62  | 0.66  | 0.69  | 0.73  | 0.76  | 0.78  | 0.59   | 0.61  | 0.65  | 0.69  | 0.73  | 0.77  | 0.78   |
| All                                                                    | 0.61  | 0.63  | 0.66  | 0.69  | 0.72  | 0.76  | 0.78  | 0.59   | 0.61  | 0.65  | 0.69  | 0.73  | 0.77  | 0.78   |

P: percentile.

1  
2  
3 **Parent-child concordance:** Correlations for the 1186 parent-child pairs are displayed in table  
4 3. Pearson's correlations for parent-child dyads were 0.22 for CRAE and 0.23 for CRVE  
5 (0.23), and (as expected for a derived ratio value) slightly smaller for AVR (0.18). Mother-  
6 child and father-child correlations are presented for reference but not compared statistically,  
7 noting slightly higher values for father-child dyads but wider CIs in keeping with the much  
8 smaller numbers. In linear regression adjusting for all covariates, estimates attenuated only  
9 marginally and all associations remained strong (estimated regression coefficients for parent-  
10 child dyads: CRAE 0.19, CRVE 0.21, AVR 0.16) with the exception of father-child AVR.  
11 Similarly, partial correlations adjusted for covariates attenuated slightly (correlation  
12 coefficient decreased by 0.01 to 0.06, data not shown).  
13  
14  
15  
16  
17  
18  
19  
20  
21  
22  
23  
24  
25  
26  
27  
28  
29  
30  
31  
32  
33  
34  
35  
36  
37  
38  
39  
40  
41  
42  
43  
44  
45  
46  
47  
48  
49  
50  
51  
52  
53  
54  
55  
56  
57  
58  
59  
60

**Table 3. Parent-child concordance**

|                                                   | Parent-child |           |                | Mother-child |           |                | Father-child |           |                |
|---------------------------------------------------|--------------|-----------|----------------|--------------|-----------|----------------|--------------|-----------|----------------|
|                                                   | N            | CC        | 95% CI         | N            | CC        | 95% CI         | N            | CC        | 95% CI         |
| <b>Pearson's Correlation</b>                      |              |           |                |              |           |                |              |           |                |
| Central retinal arteriolar calibre,               | 1186         | 0.22      | 0.16 to 0.27   | 1029         | 0.20      | 0.14 to 0.26   | 157          | 0.32      | 0.17 to 0.45   |
| Central retinal venular calibre                   | 1186         | 0.23      | 0.17 to 0.28   | 1029         | 0.22      | 0.16 to 0.28   | 157          | 0.29      | 0.14 to 0.42   |
| Arteriolar-venular ratio                          | 1186         | 0.18      | 0.13 to 0.24   | 1029         | 0.18      | 0.12 to 0.24   | 157          | 0.20      | 0.04 to 0.35   |
| <b>Adjusted Linear Regression</b>                 | <b>N</b>     | <b>RC</b> | <b>P value</b> | <b>N</b>     | <b>RC</b> | <b>P value</b> | <b>N</b>     | <b>RC</b> | <b>P value</b> |
| Central retinal arteriolar calibre, $\mu\text{m}$ | 998          | 0.18      | <0.001         | 867          | 0.18      | <0.001         | 131          | 0.21      | 0.004          |
| Central retinal venular calibre, $\mu\text{m}$    | 998          | 0.20      | <0.001         | 867          | 0.20      | <0.001         | 131          | 0.22      | 0.003          |
| Arteriolar-venular ratio                          | 998          | 0.16      | <0.001         | 867          | 0.16      | <0.001         | 131          | 0.15      | 0.06           |

Non-biological caregivers (n=10), diabetic children (n=3) and diabetic adults (n=29) were excluded from these analyses. Covariates in adjusted linear regression models include parent and child age, BMI and Disadvantage Index, mean arterial blood pressure and parent and child sex in models including both sexes. CC: estimated Pearson's correlation coefficient; CI: confidence interval; N: number of biological child-parent pairs with this measure; RC: estimated regression coefficient.

1  
2  
3 **Reliability analysis:** Within-grader intraclass correlations were very high for all three graders for  
4 CRAE (0.90 to 0.99, 95% CI 0.76 to 0.99) and CRVE (0.92 to 0.98, 95% CI 0.82 to 0.99). This  
5 equated to a greater within-grader range for the derived AVR variable (0.69 to 0.97, 95% CI 0.28  
6 to 0.99). Between-grader interclass correlations were also high at 0.79 (95% CI 0.47 to 0.91),  
7 0.92 (95% CI 0.77 to 0.96) and 0.75 (95% CI 0.58 to 0.86) for CRAE, CRVE and AVR  
8 respectively.  
9  
10  
11

12  
13 **Unplanned post-hoc analysis:** As noted above, both CRAE and CRVE were around 0.6 standard  
14 deviations smaller in the mid-life parents than the 11-12 year olds. This contrasts with Ikram's  
15 2012 review, from which we had expected that CRAE would be substantially larger by midlife,  
16 but that CRVE would remain static (prior to both reducing into old age).<sup>10</sup> Because these results  
17 were surprising, we therefore conducted some unplanned post-hoc analyses to determine how our  
18 findings fit within the existing literature. These should be considered as exploratory and  
19 hypothesis-generating only.  
20  
21  
22  
23

24  
25 We plotted mean values for CRAE and CRVE by mean age (figure 3) for 15 community-based  
26 studies published since 2004 with participants aged from 6 years to old age.<sup>11, 22, 36-47</sup> We included  
27 all adult studies (summarised in supplementary table 1) in Sun et al's systematic review<sup>15</sup> that had  
28 a community or population-based sample of >1000 individuals;<sup>40-47</sup> the Norwegian Tromso Eye  
29 Study was identified through cited reference searches.<sup>37</sup> Sun's review also identified the child  
30 population in the Singapore Cohort Study of the Risk Factors for Myopia (SCORM),<sup>36</sup> and we  
31 searched the SCORM study's bibliography and other published reviews for additional children's  
32 cohorts.<sup>11, 22, 38, 39</sup> We superimposed the results from CheckPoint, separately for adults and  
33 children. As visual inspection did not suggest a curvilinear relationship, we then fitted two  
34 exploratory linear regression models, with mean age for each study (CheckPoint children and  
35 parents considered separately) as the independent variable and with calibre size (arteriolar and  
36 venular) as the two dependent variables. It can be seen that venular calibre appears to narrow  
37 slightly (though not significantly differently from 0) at a rate of approximately -1.2  $\mu\text{m}$  per decade  
38 from childhood through adulthood ( $\beta$  coefficient -0.12, 95% CI -0.37 to 0.14,  $R^2 = 0.03$ ).  
39 However, there was no obvious trend for arteriolar calibre ( $\beta$  coefficient -0.02, 95% CI -0.21 to  
40 0.17,  $R^2 = 0.002$ ). Two striking features of the figure are the dearth of published values between  
41 childhood and late life, and the marked spread of mean values in the elderly.  
42  
43  
44  
45  
46  
47  
48  
49  
50  
51  
52  
53  
54  
55  
56  
57  
58  
59  
60

## DISCUSSION

**Principal findings:** We provide the first national population-based percentile values for the pattern and distributions of retinal vessel calibre in Australian 11-12 year old children and mid-life adults. Surprisingly, in light of previous literature, mean scores for both CRAE and CRVE were around 0.6 standard deviations smaller in parents than in children. Parent-child correlations were similar for all retinal vessel calibre metrics (CRAE 0.20, CRVE 0.22, AVR 0.17) to studies whose offspring probands were already adults, suggesting that the strong element of heritability in microvascular anatomical structure is largely phenotypically overt within the first decade of life.

**Strengths and weaknesses:** Strengths include the national recruitment basis for this large study, providing a reference point for microvascular measurement for future Australian studies but also filling a significant international gap in population-based studies of these age groups. Results were largely consistent with previous studies and should generalise to the wider Australian child population.

Limitations include our under-representation of the most disadvantaged sector (reflecting social biases in both recruitment and retention, issues common to large longitudinal studies) and the small number of fathers in the parent sample. We adjusted only for a limited range of potential confounders. While the distributions of parent retinal vessel caliber might have changed slightly had we further adjusted for smoking status, sedentary lifestyle and diet (all previously associated with altered retinal vessel calibre<sup>48</sup>), their impact on concordance would likely be small because these factors are all strongly socially patterned. By 2019 this cohort will also be able to consider genome-wide association data, potentially shedding further light on the roles of genetic and shared environmental factors. We were not able to measure refractive errors in this study. Retinal vascular calibre measurements may be influenced by refractive errors and refraction is different between children and adults.<sup>49, 50</sup> However, we would expect these effects to be small, particularly as other sources of systematic bias were minimised (measured on the same day with the same equipment by the same person who was blind to dyadic membership).

**Meaning and implications for clinicians and policy makers:** Findings for all outcomes are consistent with the previous literature. We showed a larger standard deviation in the parent than the child group, indicating a greater spread of variation in retinal calibre with age. This would be in keeping with greater physiologic dysregulation for some individuals with age in response to genetic and risk exposure (eg higher blood pressure, obesity etc) over multiple decades. Direct



1  
2  
3 comparisons of CRAE and CRVE across the lifecourse and between ethnicities remain difficult  
4 due to differences in equipment, software and analysis formulae for CRAE and CRVE. Such  
5 factors could well account for the differences between our own and three international studies at  
6 mean age 11.1-12.7 years: smaller mean CRAE and CRVE in Chinese twins (CRAE 150.1- $\mu\text{m}$ ,  
7 CRVE 218.4 $\mu\text{m}$ ) and Singapore Chinese children (CRAE 149.3 $\mu\text{m}$ , CRVE 224.6 $\mu\text{m}$ ), but much  
8 larger values in a smaller study of German children (CRAE 208 $\mu\text{m}$ , CRVE 236.2 $\mu\text{m}$ ).<sup>22, 36, 51</sup>  
9 These discrepancies highlight the need for a uniform approach to measurement of retinal  
10 parameters in future epidemiological investigations. Our post-hoc analysis of published literature  
11 suggest both a dearth of population studies between childhood and old age and a likely fall in  
12 venular calibre from childhood through midlife. An individual participant meta-analysis would be  
13 the next step to more precisely determine how retinal calibre varies by age, incorporating any  
14 additional large-scale studies that now exist.  
15  
16

17  
18  
19  
20  
21  
22  
23 The moderate parent-child correlations of this Australian population are very similar to those in  
24 previous studies with much older adult offspring, suggesting that in terms of microvasculature  
25 children do not become more phenotypically similar to their parents between childhood and  
26 midlife. Although this is the first study to report intergenerational concordance by parent sex, our  
27 marginally stronger father-child than mother-child correlations must be taken with caution due to  
28 the small sample of fathers. Like all other parent-child and twin studies except the Beaver Dam  
29 Eye Study, our CRVE correlations were marginally larger than those for CRAE.<sup>17-23</sup> Previously,  
30 Li et al. have postulated that the retinal arteriolar phenotype may be more sensitive to  
31 environmental influences than the venular phenotype, despite having a significant, moderate  
32 degree of inheritance.<sup>19</sup> This is further supported by GWAS studies, where only CRVE showed  
33 significant associations with the identified gene loci.<sup>23, 25</sup>  
34  
35  
36  
37  
38  
39  
40

41 **Unanswered questions and future research:** We provide normative values for retinal vessel  
42 calibre for Australian 11-12 year olds and mid-life adults using standardised protocols. Our  
43 findings make explicit a need for reliable age-specific normative reference values across the  
44 lifecourse. Ideally, this would be extended to large long-running cohort studies with access to  
45 clinical outcomes; to exploration of other retinal vascular features such as branching angles,  
46 tortuosity and fractal dimension; and to consider other factors such as polygenic risk scores and  
47 macrovascular risk. Such studies could help retinal calibre realise its potential as a clinical,  
48 population screening and/or risk stratification tool for cardiovascular disease.  
49  
50  
51  
52  
53  
54  
55  
56  
57  
58  
59  
60

1  
2  
3  
4  
5  
6  
7  
8  
9  
10  
11  
12  
13  
14  
15  
16  
17  
18  
19  
20  
21  
22  
23  
24  
25  
26  
27  
28  
29  
30  
31  
32  
33  
34  
35  
36  
37  
38  
39  
40  
41  
42  
43  
44  
45  
46  
47  
48  
49  
50  
51  
52  
53  
54  
55  
56  
57  
58  
59  
60

For peer review only

1  
2  
3 **ACKNOWLEDGEMENTS:** This paper uses unit record data from Growing Up in Australia, the  
4 Longitudinal Study of Australian Children. The study is conducted in partnership between the  
5 Department of Social Services (DSS), the Australian Institute of Family Studies (AIFS) and the  
6 Australian Bureau of Statistics (ABS). The findings and views reported in this paper are those of  
7 the author and should not be attributed to DSS, AIFS or the ABS. REDCap (Research Electronic  
8 Data Capture) electronic data capture tools. More information about this software can be found at:  
9 [www.project-redcap.org](http://www.project-redcap.org). We thank the LSAC and CheckPoint study participants, staff and  
10 students for their contributions.  
11  
12

13  
14  
15  
16 **COMPETING INTERESTS:** All authors have completed the ICMJE uniform disclosure form  
17 at [www.icmje.org/coi\\_disclosure.pdf](http://www.icmje.org/coi_disclosure.pdf) and declare financial support as described in the funding  
18 section. MW received support from Sandoz to present at a symposium outside the submitted work.  
19  
20

21  
22 **FUNDING:** This work was supported by the National Health and Medical Research Council  
23 (NHMRC) of Australia (Project Grants 1041352, 1109355), The Royal Children's Hospital  
24 Foundation (2014-241), the Murdoch Children's Research Institute, The University of Melbourne,  
25 the National Heart Foundation of Australia (100660) and Financial Markets Foundation for  
26 Children (2014-055, 2016-310). The following authors were supported by the NHMRC: Senior  
27 Research Fellowships to MW (1046518) and DPB (1064629); Early Career Fellowship to KLy  
28 (1091124). The following authors were supported by the National Heart Foundation of Australia:  
29 Honorary Future Leader Fellowship to DPB (100369); Postdoctoral Fellowship to KLy (101239).  
30 MW was supported by Cure Kids New Zealand and ML by a Melbourne International Research  
31 Scholarship. The MCRI administered the research grants for the study and provided infrastructural  
32 support (IT and biospecimen management) to its staff and the study, but played no role in the  
33 conduct or analysis of the trial. DSS played a role in study design; however, no other funding  
34 bodies had a role in the study design and conduct; data collection, management, analysis, and  
35 interpretation; preparation, review, or approval of the manuscript; and decision to submit the  
36 manuscript for publication. Research at the MCRI is supported by the Victorian Government's  
37 Operational Infrastructure Support Program.  
38  
39

40  
41 **CONTRIBUTIONS:** MW, TW, DB and KL contributed to the study design. JD, ML and MH  
42 contributed to the acquisition of data. AG, KL, ML and JD conducted the data analysis. JD drafted  
43 the manuscript with critical input from all authors. MW and KL supervised JD. MW is the  
44 principal investigator of the Child Health CheckPoint and conceived the paper. All authors read  
45 and approved the final manuscript.  
46  
47  
48  
49  
50  
51  
52  
53  
54  
55  
56  
57  
58  
59  
60

1  
2  
3 **DATA SHARING STATEMENT:** Dataset and technical documents available from Growing Up  
4 in Australia: The Longitudinal Study of Australian Children via low-cost license for bona fide  
5 researchers. More information is available at [www.growingupinaustralia.gov.au](http://www.growingupinaustralia.gov.au)  
6  
7  
8  
9

## 10 **FIGURE CAPTIONS AND FOOTNOTES:**

### 11 **Figure 1. Participant flow through *Child Health CheckPoint*.**

12  
13  
14 n: number of families; c: number of children; p: number of attending adults; MAC: Main  
15 assessment centre; mAC: Mini assessment centre; HV: Home visit assessment; LSAC:  
16 Longitudinal Study of Australian Children.  
17  
18

19 \*Unable to collect image due to equipment failure or time constraints.

20 ~Data excluded for images that did not meet quality criteria for 'Big 6' analysis.

21  
22  
23 ^Data from 10 non-biological child-parent pairs and 29 diabetic participants excluded from  
24 concordance analyses  
25  
26

### 27 **Figure 2. Density plots for retinal vessel calibre measures.**

28  
29 AVR: arteriolar-venular ratio; CRAE: central retinal arteriolar equivalent; CRVE: central retinal  
30 venular equivalent; BIG6: revised knudston-parr formula for calculating CRAE and CRVE using  
31 IVAN software.<sup>30</sup>  
32  
33  
34

### 35 **Figure 3. Epidemiology of retinal vascular calibre by age.**

36  
37 Mean retinal arteriolar and venular calibre by age from CheckPoint and published community-  
38 based studies with n>1000. Each symbol represents the mean value for a single study. Each study  
39 is summarised in supplementary table 1, and the paper from which that study's data are drawn is  
40 provided in the list of references. Checkpoint\_C: Child Health CheckPoint data of children;  
41  
42  
43 Checkpoint\_P: Child Health CheckPoint data of parents.  
44  
45  
46  
47

## 48 **SUPPLEMENTARY DOCUMENTS:**

### 49 **Supplementary table 1. Epidemiology of studies reporting retinal vascular calibre**

## REFERENCES

1. Levy BI AG, Pries AR, Struijker-Boudier HA. Microcirculation in Hypertension A New Target for Treatment? *Circulation* 2001;104(6):735-40. doi: <https://doi.org/10.1161/hc3101.091158>
2. Feihl F LL, Waeber B and Levy BI. Hypertension. A Disease of the Microcirculation? *Hypertension* 2006;48:1-7. doi: <http://doi.org/10.1161/01.HYP.0000249510.20326.72>
3. Granger DN, Rodrigues SF, Yildirim A, et al. Microvascular responses to cardiovascular risk factors. *Microcirculation*;17(3):192-205.
4. Sasongko MB, Wong TY, Wang JJ. Retinal arteriolar changes: intermediate pathways linking early life exposures to cardiovascular disease? *Microcirculation* 2010;17(1):21-31. doi: <http://dx.doi.org/10.1111/j.1549-8719.2009.00007.x>
5. Hughes AD. Genetic and early life influences on the human retinal microcirculation. *Basic Clin Pharmacol Toxicol* 2012;110(1):19-25. doi: <http://dx.doi.org/10.1111/j.1742-7843.2011.00817.x>
6. Li LJ LY, Wong TY, Cheung CY. . Can the retinal microvasculature offer clues to cardiovascular risk factors in early life? . *Acta Paediatr* 2013;102(10):941-6. doi: <http://dx.doi.org/10.1111/apa.12294>
7. Wong TY, Klein R, Klein B, et al. Retinal Microvascular Abnormalities and their Relationship with Hypertension, Cardiovascular Disease, and Mortality. *Surv Ophthalmol* 2001;46(1):59-80. doi: [http://dx.doi.org/10.1016/S0039-6257\(01\)00234-X](http://dx.doi.org/10.1016/S0039-6257(01)00234-X)
8. Liew G, Wang JJ, Mitchell P, et al. Retinal vascular imaging: a new tool in microvascular disease research. *Circulation Cardiovascular imaging* 2008;1(2):156-61. doi: <http://doi.org/10.1161/CIRCIMAGING.108.784876>
9. Liew G WJ. Retinal Vascular Signs: A Window to the Heart? *Rev Esp Cardiol (Engl Ed)* 2011;64(6):515-21. doi: <http://doi.org/10.1016/j.recesp.2011.02.014>
10. Ikram MK OY, Cheung CY, Wong TY. Retinal Vascular Caliber Measurements: Clinical Significance, Current Knowledge and Future perspectives. *Ophthalmologica* 2013;229:125-36. doi: <http://doi.org/10.1159/000342158>
11. Boillot A, Zoungas S, Mitchell P, et al. Obesity and the microvasculature: a systematic review and meta-analysis. *PLoS One* 2013;8(2):e52708. doi: <http://doi.org/10.1371/journal.pone.0052708>
12. Ding J, Wai KL, McGeechan K, et al. Retinal vascular caliber and the development of hypertension: a meta-analysis of individual participant data. *J Hypertens* 2014;32(2):207-15. doi: <http://doi.org/10.1097/HJH.0b013e32836586f4>
13. McGeechan K, Liew G, Macaskill P, et al. Prediction of Incident Stroke Events Based on Retinal Vessel Caliber: A Systematic Review and Individual-Participant Meta-Analysis. *Am J Epidemiol* 2009;170(11):1323-32. doi: 10.1093/aje/kwp306
14. McGeechan K, Liew G, Macaskill P, et al. Meta-analysis: Retinal vessel caliber and risk for coronary heart disease. *Ann Intern Med* 2009;151(6):404-13. doi: 10.7326/0003-4819-151-6-200909150-00005
15. Sun C, Wang JJ, Mackey DA, et al. Retinal vascular caliber: systemic, environmental, and genetic associations. *Surv Ophthalmol* 2009;54(1):74-95. doi: <http://dx.doi.org/10.1016/j.survophthal.2008.10.003>
16. Mimoun L, Massin P, Steg G. Retinal microvascularisation abnormalities and cardiovascular risk. *Arch Cardiovasc Dis* 2009;102(5):449-56. doi: <http://dx.doi.org/10.1016/j.acvd.2009.02.008>
17. Lee KE, Klein BEK, Klein R, et al. Familial Aggregation of Retinal Vessel Caliber in the Beaver Dam Eye Study. *Invest Ophthalmol Vis Sci* 2004;45(11):3929-33. doi: <http://doi.org/10.1167/iovs.04-0462>

18. Liu YP, Kuznetsova T, Jin Y, et al. Heritability of the retinal microcirculation in Flemish families. *Am J Hypertens* 2013;26(3):392-99. doi: <http://dx.doi.org/10.1093/ajh/hps064>
19. Li LJ, Liao J, Fan Q, et al. Familial correlation of retinal vascular caliber in Singapore Chinese. *Invest Ophthalmol Vis Sci* 2013;54(8):5638-42. doi: <http://dx.doi.org/10.1167/iovs.13-12418>
20. Taarnhoj NCB, Larsen M, Sander B, et al. Heritability of retinal vessel diameters and blood pressure: A twin study. *Invest Ophthalmol Vis Sci* 2006;47(8):3539-44. doi: <http://dx.doi.org/10.1167/iovs.05-1372>
21. Fahy SJ, Sun C, Zhu G, et al. The relationship between retinal arteriolar and venular calibers is genetically mediated, and each is associated with risk of cardiovascular disease. *Invest Ophthalmol Vis Sci* 2011;52(2):975-81. doi: <http://dx.doi.org/10.1167/iovs.10-5927>
22. Zheng Y, Huang W, Zhang J, et al. Phenotypic and genetic correlation of blood pressure and body mass index with retinal vascular caliber in children and adolescents: the Guangzhou twin eye study. *Invest Ophthalmol Vis Sci* 2013;54(1):423-8. doi: <http://dx.doi.org/10.1167/iovs.12-9543>
23. Sun C, Zhu G, Wong TY, et al. Quantitative genetic analysis of the retinal vascular caliber: the Australian Twins Eye Study. *Hypertension* 2009;54(4):788-95. doi: <http://dx.doi.org/10.1161/HYPERTENSIONAHA.109.132902>
24. Tenesa A, Haley CS. The heritability of human disease: estimation, uses and abuses. *Nat Rev Genet* 2013;14:139-49. doi: <http://doi.org/10.1038/nrg3377>
25. Ikram MK, Xie J, Jensen RA, Cotch MF, Hewitt AW, Klein MA. Four Novel Loci (19q13 q, 12q24, and 5q14) Influence the Microcirculation In Vivo. *PLoS ONE*. 2010;6(10):1-12. Four Novel Loci (19q13, 6q24, 12q24, and 5q14) Influence the Microcirculation In Vivo. *PLoS ONE* 2010;6(10):1-12. doi: <https://doi.org/10.1371/journal.pgen.1001184>
26. Sanson A, Johnstone R. The LSAC Research Consortium & FaCS LSAC Project Team. Growing Up in Australia takes its first steps. *Family Matters* 2004;67:46-53.
27. Edwards B. Growing Up in Australia: The Longitudinal Study of Australian Children Entering adolescence and becoming a young adult. *Family Matters* 2014;95:5-14.
28. Clifford S, Davies S, Wake M. Child Health CheckPoint: Cohort summary and methodology of a physical health and biospecimen module for the Longitudinal Study of Australian Children. *Submitted to BMJ Open October 2017* doi: <https://doi.org/10.25374/MCRI.5687590>
29. Wake M, Clifford S, York E, et al. Introducing Growing Up in Australia's Child Health CheckPoint. *Family Matters* 2014;94:15-23.
30. Knudtson MD, Klein LK, Hubbard LD, Wong TY, Klein R, Klein BEK. Revised formulas for summarizing retinal vessel diameters. *Curr Eye Res* 2003;27(3):143-49. doi: <https://doi.org/10.1076/ceyr.27.3.143.16049>
31. Wong TY, Klein R, Klein BEK, Meuer SM, Hubbard LD. Computer-assisted measurement of retinal vessel diameters in the Beaver Dam Eye Study: Methodology, Correlation between Eyes, and Effect of Refractive Errors. *Ophthalmology* 2004;111(6):1183-90. doi: <http://doi.org/10.1016/j.ophtha.2003.09.039>
32. Kuczmarski RJ, Guo SS, et al. 2000 CDC Growth Charts for the United States: methods and development. *Vital Health Stat 11* 2002:1-190.
33. Australian-Bureau-of-Statistics. Census of Population and Housing: Socio-Economic Indexes for Areas (SEIFA) 2011;(cat. no. 2033.0.55.001) [Available from: <http://www.abs.gov.au/websitedbs/censushome.nsf/home/seifa2011>]
34. Heeringa SG, Berglund PA. Applied survey data analysis. Boca Raton, FL: CRC Press 2010.

- 1  
2  
3 35. Ellul S HR, Mensah FK, Carlin JB. Longitudinal Study of Australian Children's Child Health  
4 CheckPoint Technical Paper 1: Weighting and Non-Response. 2018 doi:  
5 <https://doi.org/10.25374/MCRI.5687593>
- 6 36. Cheung N SS, Liew G, Liu EY, Hodgson L, Mitchell P, Wong TY. Childhood Vascular Risk  
7 Factors and Retinal Vessel Caliber. *Asia Pac J Ophthalmol (Phila)* 2012;1:193-7. doi:  
8 <http://doi.org/10.1097/APO.0b013e31825e4d79>
- 9 37. Von Hanno T, Bertelsen G, Sjolie AK, et al. Retinal vascular calibres are significantly  
10 associated with cardiovascular risk factors: the Tromso Eye Study. *Acta Ophthalmol*  
11 2014;92(1):40-6. doi: <http://doi.org/10.1111/aos.12102>
- 12 38. Gopinath B BL, Wang JJ, et al. . Blood pressure is associated with retinal vessel signs in  
13 preadolescent children. *J Hypertens* 2010;28:1406-12. doi:  
14 <http://doi.org/10.1097/HJH.0b013e3283395223>
- 15 39. Mitchell P, Liew G, Rochtchina E, et al. Evidence of arteriolar narrowing in low-birth-weight  
16 children. *Circulation* 2008;118(5):518-24. doi:  
17 <http://dx.doi.org/10.1161/CIRCULATIONAHA.107.747329>
- 18 40. Gishti O, Jaddoe VWV, Felix JF, et al. Retinal Microvasculature and Cardiovascular Health in  
19 Childhood. *Pediatrics* 2015;135(4):678-85. doi: <http://doi.org/10.1542/peds.2014-3341>
- 20 41. Kawasaki R WJ, Rochtchina E, et al. . Cardiovascular risk factors and retinal microvascular  
21 signs in an adult Japanese population: the funagata study. *Ophthalmology*  
22 2006;113(8):1378-84. doi: <http://doi.org/10.1016/j.ophtha.2006.02.052>
- 23 42. Liew G, Sharrett AR, Wang JJ, et al. Relative importance of systemic determinants of retinal  
24 arteriolar and venular caliber: the atherosclerosis risk in communities study. *Arch*  
25 *Ophthalmol* 2008;126(10):1404-10. doi: <http://dx.doi.org/10.1001/archophth.126.10.1404>
- 26 43. Wong TY, Islam FM, Klein R, et al. Retinal vascular caliber, cardiovascular risk factors, and  
27 inflammation: the multi-ethnic study of atherosclerosis (MESA). *Invest Ophthalmol Vis*  
28 *Sci* 2006;47(6):2341-50. doi: <http://doi.org/10.1167/iovs.05-1539>
- 29 44. Klein R, Klein BEK, Knudtson MD, et al. Are inflammatory factors related to retinal vessel  
30 caliber? The Beaver Dam Eye Study. *Arch Ophthalmol* 2006;124(1):87-94. doi:  
31 <http://doi.org/10.1001/archophth.124.1.87>
- 32 45. Kawasaki R, Wang JJ, Rochtchina E, et al. Retinal vessel caliber is associated with the 10-year  
33 incidence of glaucoma: the Blue Mountains Eye Study. *Ophthalmology* 2013;120(1):84-  
34 90. doi: <http://doi.org/10.1016/j.ophtha.2012.07.007>
- 35 46. Ikram MK, de Jong FJ, Vingerling JR, et al. Are retinal arteriolar or venular diameters  
36 associated with markers for cardiovascular disorders? The Rotterdam Study. *Invest*  
37 *Ophthalmol Vis Sci* 2004;45(7):2129-34. doi: <http://doi.org/10.1167/iovs.03-1390>
- 38 47. Kim DH, Newman AB, Hajjar I, et al. Retinal microvascular signs and functional loss in older  
39 persons: the cardiovascular health study. *Stroke* 2011;42(6):1589-95. doi:  
40 <http://doi.org/10.1161/STROKEAHA.110.605261>
- 41 48. Serre KR, Sasongko MB. Modifiable Lifestyle and Environmental Risk Factors Affecting the  
42 Retinal Microcirculation. *Microcirculation* 2012;19(1):29-36. doi:  
43 <http://dx.doi.org/10.1111/j.1549-8719.2011.00121.x>
- 44 49. Wong TY WJ, Rochtchina E, Klein R, Mitchell P. Does refractive error influence the  
45 association of blood pressure and retinal vessel diameters? The Blue Mountains Eye Study.  
46 *Am J Ophthalmol* 2004;137(6):1050-5. doi: <http://doi.org/10.1016/j.ajo.2004.01.035>
- 47 50. Cheung N TG, Saw SM, Amirul Islam FM, Mitchell P, Wang JJ, Wong TY. Relationship of  
48 axial length and retinal vascular caliber in children. *Ophthalmologica* 2007;144(5):658-62.  
49 doi: <http://doi.org/10.1016/j.ajo.2007.07.023>
- 50 51. Hanssen H, Siegrist M, Neidig M, et al. Retinal vessel diameter, obesity and metabolic risk  
51 factors in school children (JuvenTUM 3). *Atherosclerosis* 2012;221(1):242-8. doi:  
52 <http://dx.doi.org/10.1016/j.atherosclerosis.2011.12.029>
- 53  
54  
55  
56  
57  
58  
59  
60

1  
2  
3  
4  
5  
6  
7  
8  
9  
10  
11  
12  
13  
14  
15  
16  
17  
18  
19  
20  
21  
22  
23  
24  
25  
26  
27  
28  
29  
30  
31  
32  
33  
34  
35  
36  
37  
38  
39  
40  
41  
42  
43  
44  
45  
46  
47  
48  
49  
50  
51  
52  
53  
54  
55  
56  
57  
58  
59  
60

For peer review only



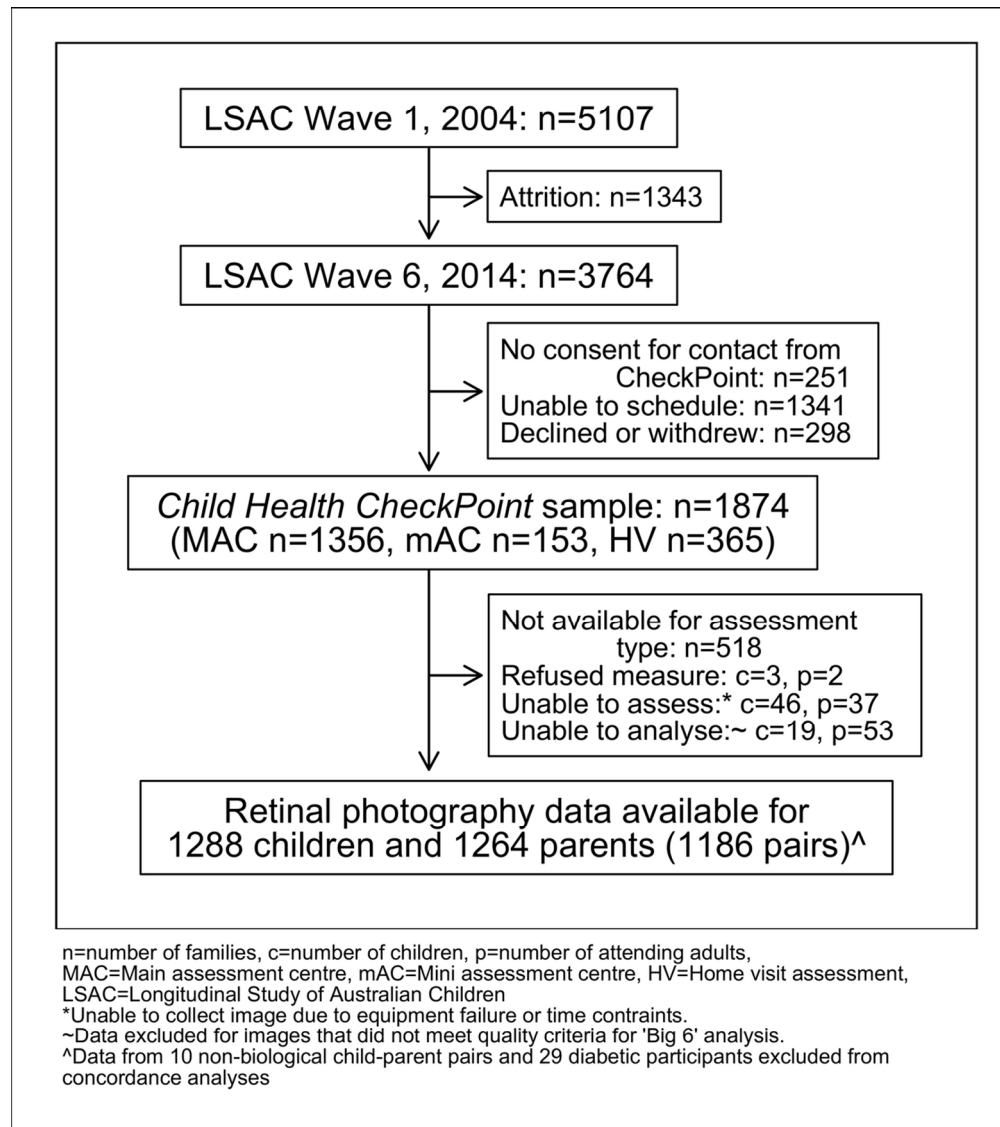

43 Figure 1. Participant flow through Child Health CheckPoint.  
44 n: number of families; c: number of children; p: number of attending adults; MAC: Main assessment centre;  
45 mAC: Mini assessment centre; HV: Home visit assessment; LSAC: Longitudinal Study of Australian Children.  
46 \*Unable to collect image due to equipment failure or time constraints.  
47 ~Data excluded for images that did not meet quality criteria for 'Big 6' analysis.  
48 ^Data from 10 non-biological child-parent pairs and 29 diabetic participants excluded from concordance  
49 analyses

50 57x64mm (600 x 600 DPI)

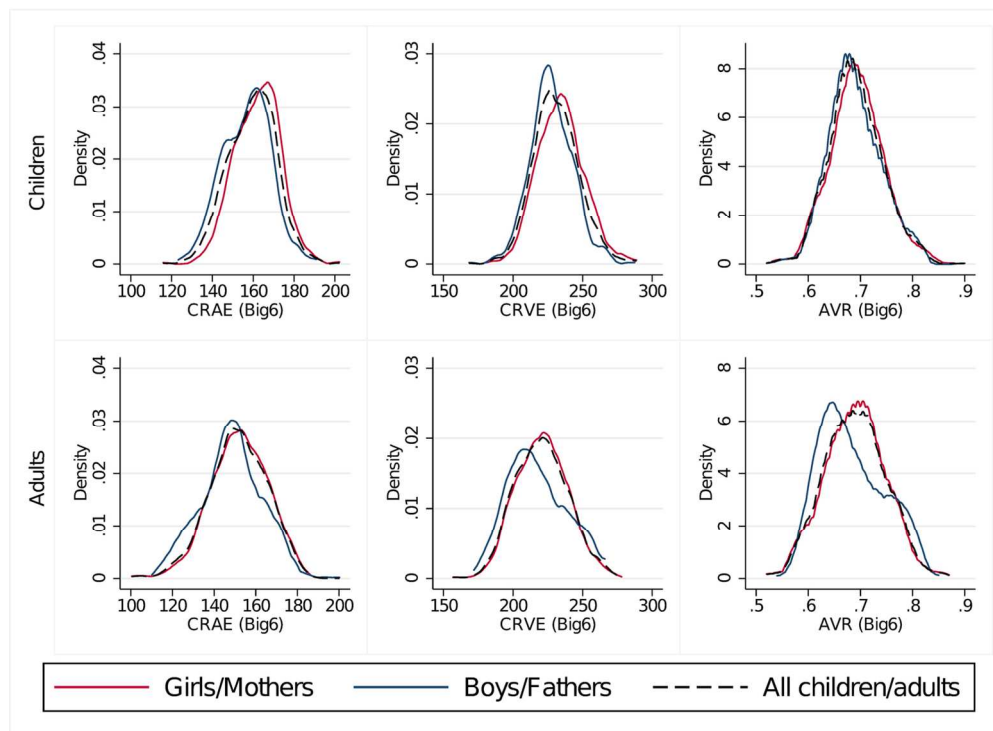

Figure 2. Density plots for retinal vessel calibre measures.  
 AVR: arteriolar-venular ratio; CRAE: central retinal arteriolar equivalent; CRVE: central retinal venular equivalent; BIG6: revised knudston-parr formula for calculating CRAE and CRVE using IVAN software.<sup>30</sup>

66x48mm (600 x 600 DPI)

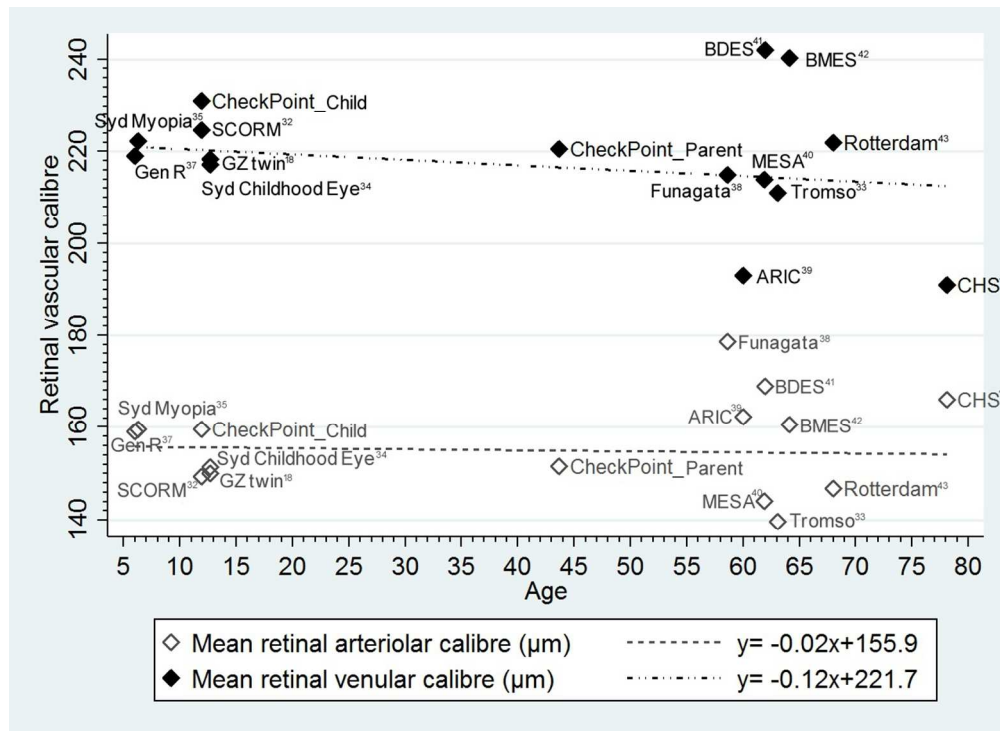

Figure 3. Epidemiology of retinal vascular calibre by age. † † Mean retinal arteriolar and venular calibre by age from CheckPoint and published community-based studies with n>1000. Each symbol represents the mean value for a single study. Each study is summarised in supplementary table 1, and the paper from which that study's data are drawn is provided in the list of references. Checkpoint\_C: Child Health CheckPoint data of children; CheckPoint\_P: Child Health CheckPoint data of parents. † †

450x328mm (72 x 72 DPI)

Only

**Supplementary Table 1. Epidemiology of studies reported retinal vascular calibre**

| Author; publication year<br>reference number | Study name; country    | Examination<br>year | Sample<br>size | Mean age<br>(years) | Arteriolar calibre<br>(mean(SD), $\mu\text{m}$ ) | Venular calibre<br>(mean(SD), $\mu\text{m}$ ) |
|----------------------------------------------|------------------------|---------------------|----------------|---------------------|--------------------------------------------------|-----------------------------------------------|
| <b>Children</b>                              |                        |                     |                |                     |                                                  |                                               |
| Gishti; 2015 <sup>37</sup>                   | Gen R; Netherlands     | 2008-2010           | 4007           | 6                   | 159.0 (14.9)                                     | 219.0 (20.2)                                  |
| Mitchell; 2008 <sup>35</sup>                 | Syd Myopia; AU         | 2003-2004           | 1369           | 6.3                 | 159.6 (ns)                                       | 222.3 (ns)                                    |
| Cheung; 2012 <sup>32</sup>                   | SCORM; Singapore       | 2006                | 1225           | 11.9                | 149.3 (12.3)                                     | 224.6 (17.8)                                  |
|                                              | CheckPoint_C; AU       | 2015-2016           | 1288           | 11.9                | 159.5 (11.8)                                     | 231.1 (16.5)                                  |
| Gopinath; 2010 <sup>34</sup>                 | Syd Childhood Eye; AU  | 2004-2005           | 2272           | 12.7                | 151.4 (12.1)                                     | 151.4 (12.1)                                  |
| Zheng; 2013 <sup>18</sup>                    | GZ twin; China         | 2009                | 2070           | 12.7                | 150.1 (13.4)                                     | 218.4 (19.1)                                  |
| <b>Adults</b>                                |                        |                     |                |                     |                                                  |                                               |
|                                              | CheckPoint_P; AU       | 2015-2016           | 1264           | 43.7                | 151.5 (14.0)                                     | 220.6 (19.0)                                  |
| Kawasaki-1; 2006 <sup>38</sup>               | Funagata; Japan        | 2000-2002           | 1481           | 58.6                | 178.6 (21.0)                                     | 214.9 (20.6)                                  |
| Liew; 2008 <sup>39</sup>                     | ARIC; USA              | 1993-1995           | 8794           | 60                  | 162.3 (ns)                                       | 193.1 (ns)                                    |
| Wong; 2006 <sup>40</sup>                     | MESA; USA              | 2002-2004           | 5979           | 61.9                | 144.1 (14.4)                                     | 214.0 (22.2)                                  |
| Klein; 2006 <sup>41</sup>                    | BDES; USA              | 1988-1990           | 4926           | 62                  | 169 (ns)                                         | 242 (ns)                                      |
| Von; 2014 <sup>33</sup>                      | Tromso; Norway         | 2007-2008           | 6353           | 63.1                | 139.7 (14.6)                                     | 211.1 (21.1)                                  |
| Kawasaki-2; 2013 <sup>42</sup>               | BMES; Australia        | 2003                | 2335           | 64.1                | 160.6 (14.9)                                     | 240.3 (22.4)                                  |
| Ikram; 2004 <sup>43</sup>                    | Rotterdam; Netherlands | 1990-1993           | 5674           | 68                  | 146.9 (14.4)                                     | 222.0 (20.9)                                  |
| Kim; 2010 <sup>44</sup>                      | CHS; USA               | 1997-1998           | 1744           | 78.1                | 166 (19)                                         | 191 (18)                                      |

Abbreviations: SD, standard deviation; AU, Australia; USA, United State of America; Gen R, Generation R Study; Syd Myopia, The Sydney Myopia Study; SCORM, Singapore Cohort Study of the Risk Factors for Myopia; CheckPoint\_C, Child Health CheckPoint data of children; Syd Childhood Eye; The Sydney Childhood Eye Study; GZ twin; The Guangzhou twin eye study; CheckPoint\_P, Child Health CheckPoint data of parents; ARIC; Atherosclerosis Risk In Communities; MESA; Multi-Ethnic Study of Atherosclerosis; BDES; Beaver Dam Eye Study; Tromso, The Tromsø Eye Study; BMES; Blue Mountains Eye Study; Rotterdam; The Rotterdam Study; CHS; Cardiovascular Health Study; ns, not stated.

**STROBE 2007 (v4) Statement—Checklist of items that should be included in reports of *cohort studies***

| Section/Topic                | Item # | Recommendation                                                                                                                                                                       | Reported on page # |
|------------------------------|--------|--------------------------------------------------------------------------------------------------------------------------------------------------------------------------------------|--------------------|
| Title and abstract           | 1      | (a) Indicate the study's design with a commonly used term in the title or the abstract                                                                                               | 1, 2               |
|                              |        | (b) Provide in the abstract an informative and balanced summary of what was done and what was found                                                                                  | 3                  |
| <b>Introduction</b>          |        |                                                                                                                                                                                      |                    |
| Background/rationale         | 2      | Explain the scientific background and rationale for the investigation being reported                                                                                                 | 5, 6               |
| Objectives                   | 3      | State specific objectives, including any prespecified hypotheses                                                                                                                     | 6                  |
| <b>Methods</b>               |        |                                                                                                                                                                                      |                    |
| Study design                 | 4      | Present key elements of study design early in the paper                                                                                                                              | 6, 7               |
| Setting                      | 5      | Describe the setting, locations, and relevant dates, including periods of recruitment, exposure, follow-up, and data collection                                                      | 6, 7               |
| Participants                 | 6      | (a) Give the eligibility criteria, and the sources and methods of selection of participants. Describe methods of follow-up                                                           | 6, 7               |
|                              |        | (b) For matched studies, give matching criteria and number of exposed and unexposed                                                                                                  |                    |
| Variables                    | 7      | Clearly define all outcomes, exposures, predictors, potential confounders, and effect modifiers. Give diagnostic criteria, if applicable                                             | 7, 8               |
| Data sources/<br>measurement | 8*     | For each variable of interest, give sources of data and details of methods of assessment (measurement). Describe comparability of assessment methods if there is more than one group | 7, 8               |
| Bias                         | 9      | Describe any efforts to address potential sources of bias                                                                                                                            |                    |
| Study size                   | 10     | Explain how the study size was arrived at                                                                                                                                            | 6, 7, figure 1     |
| Quantitative variables       | 11     | Explain how quantitative variables were handled in the analyses. If applicable, describe which groupings were chosen and why                                                         | 7, 8               |
| Statistical methods          | 12     | (a) Describe all statistical methods, including those used to control for confounding                                                                                                | 9                  |
|                              |        | (b) Describe any methods used to examine subgroups and interactions                                                                                                                  | 9                  |
|                              |        | (c) Explain how missing data were addressed                                                                                                                                          |                    |
|                              |        | (d) If applicable, explain how loss to follow-up was addressed                                                                                                                       |                    |
|                              |        | (e) Describe any sensitivity analyses                                                                                                                                                |                    |
| <b>Results</b>               |        |                                                                                                                                                                                      |                    |

|                          |     |                                                                                                                                                                                                              |                      |
|--------------------------|-----|--------------------------------------------------------------------------------------------------------------------------------------------------------------------------------------------------------------|----------------------|
| Participants             | 13* | (a) Report numbers of individuals at each stage of study—eg numbers potentially eligible, examined for eligibility, confirmed eligible, included in the study, completing follow-up, and analysed            | 10, Figure 1         |
|                          |     | (b) Give reasons for non-participation at each stage                                                                                                                                                         | 7,10, figure 1       |
|                          |     | (c) Consider use of a flow diagram                                                                                                                                                                           | Figure 1             |
| Descriptive data         | 14* | (a) Give characteristics of study participants (eg demographic, clinical, social) and information on exposures and potential confounders                                                                     | 8, 10, table 1       |
|                          |     | (b) Indicate number of participants with missing data for each variable of interest                                                                                                                          | Figure 1             |
|                          |     | (c) Summarise follow-up time (eg, average and total amount)                                                                                                                                                  |                      |
| Outcome data             | 15* | Report numbers of outcome events or summary measures over time                                                                                                                                               | 10, table 1, table 2 |
| Main results             | 16  | (a) Give unadjusted estimates and, if applicable, confounder-adjusted estimates and their precision (eg, 95% confidence interval). Make clear which confounders were adjusted for and why they were included | 13, 14               |
|                          |     | (b) Report category boundaries when continuous variables were categorized                                                                                                                                    |                      |
|                          |     | (c) If relevant, consider translating estimates of relative risk into absolute risk for a meaningful time period                                                                                             |                      |
| Other analyses           | 17  | Report other analyses done—eg analyses of subgroups and interactions, and sensitivity analyses                                                                                                               | 15                   |
| <b>Discussion</b>        |     |                                                                                                                                                                                                              |                      |
| Key results              | 18  | Summarise key results with reference to study objectives                                                                                                                                                     | 15, 16               |
| <b>Limitations</b>       |     |                                                                                                                                                                                                              |                      |
| Interpretation           | 20  | Give a cautious overall interpretation of results considering objectives, limitations, multiplicity of analyses, results from similar studies, and other relevant evidence                                   | 16, 17               |
| Generalisability         | 21  | Discuss the generalisability (external validity) of the study results                                                                                                                                        | 16, 17               |
| <b>Other information</b> |     |                                                                                                                                                                                                              |                      |
| Funding                  | 22  | Give the source of funding and the role of the funders for the present study and, if applicable, for the original study on which the present article is based                                                | 18, 19               |

\*Give information separately for cases and controls in case-control studies and, if applicable, for exposed and unexposed groups in cohort and cross-sectional studies.

**Note:** An Explanation and Elaboration article discusses each checklist item and gives methodological background and published examples of transparent reporting. The STROBE checklist is best used in conjunction with this article (freely available on the Web sites of PLoS Medicine at <http://www.plosmedicine.org/>, Annals of Internal Medicine at <http://www.annals.org/>, and Epidemiology at <http://www.epidem.com/>). Information on the STROBE Initiative is available at [www.strobe-statement.org](http://www.strobe-statement.org).
